1 **Exposure to Noise and Cardiovascular Disease in a Nationwide US Prospective Cohort**  
2 **Study of Women**

3  
4 **Authors:**

5 Charlotte Roscoe

6 Department of Environmental Health, Harvard T.H. Chan School of Public Health, Boston, MA  
7 USA

8 Channing Division of Network Medicine, Department of Medicine, Brigham and Women's  
9 Hospital and Harvard Medical School, Boston, MA USA

10 Division of Population Sciences, Dana Faber Cancer Institute, Boston, MA USA

11  
12 Stephanie T. Grady

13 Department of Environmental Health, Boston University School of Public Health, Boston, MA  
14 USA

15  
16 Jaime E. Hart

17 Channing Division of Network Medicine, Department of Medicine, Brigham and Women's  
18 Hospital and Harvard Medical School

19 Department of Environmental Health, Harvard T.H. Chan School of Public Health  
20 Boston, MA USA

21  
22 Hari S. Iyer

23 Section of Cancer Epidemiology and Health Outcomes  
24 Rutgers Cancer Institute of New Jersey, New Brunswick, NJ USA

25  
26 JoAnn E. Manson

27 Division of Preventive Medicine, Department of Medicine, Brigham and Women's Hospital and  
28 Harvard Medical School

29 Department of Epidemiology, Harvard T.H. Chan School of Public Health  
30 Boston, MA USA

31  
32 Kathryn M. Rexrode

33 Division of Women's Health, Department of Medicine, Brigham and Women's Hospital and  
34 Harvard Medical School

35 Boston, MA USA

36  
37 Eric B. Rimm

38 Departments of Nutrition and Epidemiology, Harvard T.H. Chan School of Public Health,  
39 Boston

40 Channing Division of Network Medicine, Department of Medicine, Brigham and Women's  
41 Hospital and Harvard Medical School

42 Boston, MA USA

43  
44 Francine Laden

45 Department of Environmental Health and Epidemiology, Harvard T.H. Chan School of Public  
46 Health

47 Channing Division of Network Medicine, Department of Medicine, Brigham and Women's  
48 Hospital and Harvard Medical School  
49 Boston, MA USA

50  
51 Peter James, ScD  
52 Division of Chronic Disease Research Across the Lifecourse (CoRAL)  
53 Department of Population Medicine  
54 Harvard Medical School and Harvard Pilgrim Health Care Institute  
55 Department of Environmental Health, Harvard T.H. Chan School of Public Health  
56 Boston, MA USA

57  
58 **Corresponding Author:**  
59 Charlotte Roscoe  
60 Channing Division of Network Medicine,  
61 181 Longwood Avenue,  
62 Landmark Center, Floor 3,  
63 Boston MA 02215  
64 USA  
65 (+1) 857-225-4177  
66 croscoe@hsph.harvard.edu

67  
68 **Running Title:** Noise and CVD in a nationwide cohort  
69

70 **Acknowledgements**  
71 We would like to thank the participants and staff of the Nurses' Health Study for their valuable  
72 contributions. The authors assume full responsibility for analyses and interpretation of these data.  
73 This work was supported by NIH grants UM1 CA186107, U01 HL145386, R01 HL034594, R01  
74 HL088521, R01 ES028033, R01 ES026246, R01 HL150119, P30 ES000002, and  
75 W81XWH2210030.

76  
77 **Declaration of competing financial interests**  
78 The authors declare no competing financial interests.  
79

80 **Ethics**  
81 The study protocol was approved by the Institutional Review Boards of the Brigham and  
82 Women's Hospital and the Harvard T.H. Chan School of Public Health.  
83

84 **Data sharing**  
85 Access to Channing Division of Network Medicine Cohorts, which include the Nurses' Health  
86 Study, requires the proposal and approval of the specific research project and is not sharable.

87 **Abstract**

88 **Background:** Long-term noise exposure is associated with cardiovascular disease (CVD),  
89 including acute cardiovascular events such as myocardial infarction and stroke. However,  
90 longitudinal cohort studies of long-term noise and CVD are almost exclusively from Europe, and  
91 few modelled nighttime and daytime noise separately. We aimed to examine the prospective  
92 association of outdoor long-term nighttime and daytime noise from anthropogenic sources with  
93 incident CVD using a US-based, nationwide cohort of women.

94  
95 **Methods:** We linked  $L_{50}$  (median) nighttime and  $L_{50}$  daytime modelled anthropogenic noise  
96 estimates from a US National Park Service model to geocoded residential addresses of 114,116  
97 participants in the Nurses' Health Study. We used time-varying Cox proportional hazards models  
98 to estimate risk of incident CVD, coronary heart disease (CHD), and stroke associated with long-  
99 term average noise exposure, adjusted for potential individual- and area-level confounders and  
100 CVD risk factors (1988-2018). We assessed effect modification by population density, region, air  
101 pollution, vegetation cover, and neighborhood socioeconomic status, and explored mediation by  
102 self-reported average nightly sleep duration.

103  
104 **Results:** Over 2,544,035 person-years, there were 10,331 incident CVD events. In fully-adjusted  
105 models, the hazard ratios for each interquartile range increase in  $L_{50}$  nighttime noise (3.67 dBA)  
106 and  $L_{50}$  daytime noise (4.35 dBA), respectively, were 1.04 (95% CI 1.02, 1.06) and 1.04 (95% CI  
107 1.02, 1.07). Similar associations were observed for CHD and stroke. Stratified analyses suggested  
108 that associations of nighttime and daytime noise with CVD did not differ by prespecified effect  
109 modifiers. We found no evidence that inadequate sleep (< 5 hours per night) mediated associations  
110 of noise and CVD.

111  
112 **Discussion:** Outdoor median nighttime and daytime noise at the residential address was associated  
113 with a small increase in CVD risk in a cohort of adult female nurses.

114  
115 **Abstract Word Count: 281**

116 **Article Word Count: 3,812**

117  
118

## 119 **Introduction**

120 Noise, or unwanted sound exposure, is the second largest environmental cause of health problems,  
121 after air pollution, and has been associated with multiple adverse outcomes, which include  
122 annoyance, sleep disturbance, and poor concentration.<sup>1-3</sup> In addition, epidemiological studies have  
123 found associations of long-term noise exposure with risk of metabolic and cardiovascular disease  
124 (CVD).<sup>4</sup>

125  
126 Exposure to noise has been linked to short-term changes in circulation, such as blood pressure,  
127 heart rate, cardiac output, and vasoconstriction.<sup>5-7</sup> These biological changes can occur not only at  
128 high sound levels in occupational settings, but also during exposure to lower levels of  
129 environmental noise in residential settings.<sup>8</sup> Noise exposure activates the central nervous system  
130 and triggers a host of changes in various subsystems in the human body identical to a typical stress  
131 response.<sup>9</sup> Reactions include activation of the hypothalamic-pituitary-adrenal axis and the  
132 sympathetic nervous system, which is triggered by limbic activity in the brain, and results in the  
133 release of stress hormones (glucocorticoids and catecholamines); repeated release of stress  
134 hormones associated with long-term noise exposure may manifest in inflammation,  
135 atherosclerosis, insulin-resistance, and CVD.<sup>10-12</sup>

136  
137 Prospective cohort studies conducted in Europe<sup>13-18</sup> and Canada<sup>19</sup> suggest that higher levels of  
138 environmental noise are linked to increased risk of CHD and stroke, although findings are  
139 inconsistent.<sup>20-23</sup> In a 2018 WHO review, evidence linking long-term noise exposure with CHD  
140 and stroke was graded as high- and moderate-quality, respectively<sup>24</sup>; however, few studies have  
141 been conducted in the US, and no study has assessed the prospective association of nighttime  
142 anthropogenic noise and CVD in a nationwide US study. Epidemiologic studies indicate that  
143 nighttime noise exposure may be more relevant for cardiovascular outcomes than daytime  
144 exposure.<sup>25</sup> While many epidemiological studies have weighted noise models to assign a penalty  
145 to nighttime noise (e.g., adding a 10 dB to noise between 10pm and 7am), few studies specifically  
146 assessed nighttime noise exposure, which occurs when individuals are most likely to be home and  
147 sleeping.

148  
149 In the US, anthropogenic noise has been assessed ecologically,<sup>26</sup> however, there is a deficit of  
150 individual-level epidemiological US-based studies on noise and chronic disease. Using data from  
151 the nationwide, US-based Nurses' Health Study (NHS) from 1988-2018, we examined the  
152 association of anthropogenic nighttime and daytime noise with CVD incidence. We also examined  
153 whether the association of noise and CVD differed by population density, region, air pollution  
154 level, greenness level, or neighborhood socioeconomic status (SES), and if associations were  
155 mediated by sleep.

## 156 157 **Methods**

### 158 159 ***Population***

160 The Nurses' Health Study (NHS) is a prospective cohort study designed to assess risk factors for  
161 chronic disease among women. In 1976, 121,701 female registered nurses aged 30-55 years, from  
162 11 states (CA, CT, IN, IA, KY, MA, MI, MO, NY, NC, OH, PA, SC, and TX), returned an initial  
163 health-related questionnaire and have since been followed with biennial questionnaires on  
164 demographic and physical characteristics, lifestyle, and health status. Response rates at each

165 questionnaire cycle have consistently been  $\geq 90\%$ .<sup>27,28</sup> The residential addresses have been  
166 geocoded (i.e., assigned latitude and longitude) and updated at each move of address. NHS  
167 participants currently reside in all states in the contiguous US and the District of Columbia (**Figure**  
168 **1**). This analysis was conducted among all women who were alive and had no prior CVD in 1988  
169 and had at least one residential address geocoded in the contiguous US for exposure assessment  
170 between 1988 and 2018. This study was approved by the Institutional Review Board of Brigham  
171 and Women's Hospital, Boston, MA.

172

### 173 **Outcome**

174 On the baseline and all subsequent biennial follow-up questionnaires, participants were asked to  
175 report all occurrences of clinician diagnosed CVD (coronary heart disease (CHD) or stroke) and  
176 participants (or next-of-kin for fatal cases) provided consent to review medical records pertaining  
177 to their diagnosis. Methods to confirm incident CVD in NHS have been published in detail  
178 elsewhere.<sup>29-31</sup> In brief, incident CVD was determined as the first occurrence of either non-fatal  
179 myocardial infarction (MI) or fatal CHD (ICD-9 code 410) or non-fatal or fatal stroke (ICD-9  
180 codes 430-437). Cases of non-fatal CVD were confirmed through medical record review or  
181 through interview or a letter confirming hospitalization for the non-fatal MI or stroke. Cases of  
182 fatal CHD or fatal stroke were confirmed through hospital record review, autopsy, report of the  
183 underlying cause on the death certificate, a history of CHD or stroke and CHD or stroke was the  
184 most plausible cause of death, or supporting information provided by a family member. Stroke  
185 sub-causes were classified according to the criteria of the National Survey of Stroke as due to  
186 ischemia (embolic or thrombotic; ICD-9 codes 430-432), hemorrhage (subarachnoid hemorrhage  
187 or intracerebral hemorrhage; ICD-9 codes 433-434 and 436), or other, unspecified/unknown cause.

188

### 189 **Exposure**

190 National Park Service researchers created a geospatial noise model to predict outdoor sound levels  
191 for the contiguous US (**Figure 1**).<sup>32,33</sup> The model used acoustic data from 1.5 million hours of  
192 long-term measurements from 492 urban and rural monitoring sites located across the contiguous  
193 US during 2000-2014. The geospatial noise model regressed monitored sound-levels with spatial  
194 datasets of environmental factors such as topography, climate, hydrology, and anthropogenic  
195 activity. Using a random forest approach (a tree-based machine learning algorithm), the ensemble  
196 of spatial datasets that best predicted measured sound-levels were retained, and their relative  
197 contribution to sound-levels at monitoring sites was used to estimate sound levels in locations  
198 where monitoring stations were not present. The geospatial noise model was cross-validated using  
199 a leave-one-out cross-validation process. Cross-validated residuals relative to those from the null  
200 model indicate that root mean squared error ranged from 4.5-4.9 dB, median absolute deviation  
201 ranged from 2.3-2.4 dB, and the percent of variance explained ranged from 80-84% across the  
202 noise metrics that we considered. The resulting model enabled the mapping of sound levels at a  
203 270 m x 270 m resolution across the contiguous US, over a 14-year period (long-term average).  
204 Noise estimates were appended to each residential address throughout follow-up (updated each  
205 time a participant moved address), based on the 270 m grid cell the address was contained within.  
206 We carried backwards and forwards the temporally invariant noise estimates from 2000-2014 to  
207 1988-2018 addresses, making the assumption that relative noise levels did not change substantially  
208 over time.

209

210 Environmental sound levels vary diurnally and are summarized using a variety of statistics across  
211 multiple time scales and frequency ranges. Given the posited mechanism of nighttime noise to  
212 increase physiologic stress,<sup>33</sup> coupled with the increased likelihood that participants were  
213 occupying their residence during nighttime hours, we used the anthropogenic nighttime (7pm-  
214 7am) A-weighted L<sub>50</sub> sound pressure level metric as our primary noise exposure. The L<sub>50</sub> is an  
215 exceedance metric that corresponds to the sound pressure level exceeded 50% of the time. A-  
216 weighting is an adjustment in decibels (dBA) that reflects how the human ear perceives sound  
217 across the frequency spectrum. While many noise measures are available from the National Park  
218 Service model, we focused on anthropogenic L<sub>50</sub> nighttime (7pm-7am) and, for completeness,  
219 anthropogenic L<sub>50</sub> daytime (7am-7pm) sound pressure levels in dBA.

220

### 221 *Statistical Analysis*

222 Person-months of follow-up were accrued from the return date of the 1988 questionnaire until  
223 either the participant became a case, died, or the end of follow-up (May 31, 2018). We fit time-  
224 varying Cox proportional hazards regression models to calculate the hazard ratio (HR) and 95%  
225 confidence interval (95% CI) for developing CVD (CHD or stroke) associated with exposure to  
226 noise. We used restricted cubic splines to determine the linearity of exposure-response associations  
227 with a likelihood ratio test comparing the linear model to the model with linear and cubic spline  
228 terms. There were no deviations from linearity observed, therefore we present continuous  
229 exposure-response results, modeled per interquartile range (IQR). There were no violations of the  
230 proportional hazards assumption, which we tested by including interaction terms of noise exposure  
231 and age.

232

233 Models were stratified by age at follow-up and time period, and we examined the following  
234 covariates, determined *a priori* as potential confounders because they are CVD risk factors and/or  
235 may be correlated with noise (all variables are time-varying unless otherwise indicated): race  
236 (white/non-white, proxy for unmeasured consequences of racism, time invariant), smoking  
237 (current/past/never), pack-years smoked (continuous), family history of MI (yes/no), menopausal  
238 status (premenopausal/postmenopausal/dubious or missing), postmenopausal hormone use  
239 (premenopausal/never/current/former/missing), diet based on the Alternate Healthy Eating Index  
240 estimated from food frequency questionnaires<sup>34</sup> (continuous), alcohol consumption (grams/day:  
241 0/0.1-4.9/5.0-14.9/≥ 15/Missing), weight status (normal [body mass index (BMI) 18.5-  
242 24.9]/overweight [BMI 25-29.9]/obese [BMI > 30]), and night shift work before 1989 (never/1-14  
243 years of shift work/15-29 years of shift work/≥30 years of shift work, time invariant). To account  
244 for individual socioeconomic status (SES), we included information on self-reported parental  
245 occupation for the participant's mother (housewife/other, time invariant) and father (professional  
246 or manager/other, time invariant), whether the participant had a registered nursing degree (yes/no,  
247 time invariant), marital status (married/other), and husband's highest educational attainment (<  
248 high school/high school graduate/>high school/missing or not married, time invariant). We  
249 accounted for area-level SES by using a neighborhood SES index that we developed specifically  
250 to differentiate neighborhood deprivation amongst NHS participants. We obtained the Census  
251 tract-level variables for the temporally closest Census from the Neighborhood Change Database  
252 (NCDB), which provides US Census data from 1970, 1980, 1990, 2000, and 2010 with normalized  
253 boundaries over time.<sup>35</sup> To create the nSES score, we z-standardized and summed the following 9  
254 variables: median household income, median home value, percent with a college degree, percent  
255 non-Hispanic White, percent non-Hispanic Black, percent of foreign-born residents, percent of

256 families receiving interest or dividends, percent of occupied housing units, and percent  
257 unemployed.<sup>36</sup> We classified Census tract-level population density as <1000 people per mile<sup>2</sup> or  
258 ≥1000 people per mile<sup>2</sup> and assigned Census region of the US (Northeast/Midwest/West/South).  
259 Fine particulate matter air pollution (PM<sub>2.5</sub>) estimates were linked to participants' geocoded  
260 addresses; the air pollution exposure model is detailed elsewhere.<sup>37</sup> Vegetation cover (greenness)  
261 in a 270 m buffer around each participant's residential address was derived using Google Earth  
262 Engine from 30 m x 30 m Landsat Normalized Difference Vegetation Index (NDVI) data; the  
263 exposure assessment method is detailed elsewhere.<sup>38</sup> Participant observations missing air pollution  
264 were excluded from analyses. The missing indicator method was used to account for missing  
265 categorical covariates.

266  
267 To assess whether the association between noise exposure and CVD risk differed across  
268 susceptible subpopulations, we examined prespecified effect modification by population density  
269 (<1000 people per mile<sup>2</sup>/≥1000 people per mile<sup>2</sup>), region (Northeast/Midwest/West/South), air  
270 pollution quintile, greenness quintile, or nSES score quintile. To evaluate whether the association  
271 between continuous noise and CVD risk varied across levels of each potential modifier, we fit  
272 models that included a multiplicative interaction term between noise and the effect modifier. We  
273 reported stratum-specific HRs and 95% CIs and used likelihood ratio tests to determine statistical  
274 significance of departure from the null of no effect modification across levels of the modifier. In  
275 sensitivity analyses, we restricted analyses to 2000-2018 to assess the impact of carrying back the  
276 time-invariant noise estimates to 1988 (prior to noise sampling). We also assessed the impact of  
277 additionally adjusting for comorbidities (ever reported diabetes, elevated cholesterol, and/or high  
278 blood pressure), statin use, aspirin use, and physical activity (< 3 MET hours/week/3 to <9 MET  
279 hours/week/9 to <18 MET hours/week/≥ 18 MET hours/week) in fully adjusted models, as we  
280 believe these variables potentially lie along the causal pathway between noise and CVD.

281  
282 We evaluated whether the relationship between noise exposure and CVD was mediated by sleep  
283 duration, which was self-reported by NHS participants on 1986, 2000, 2002, 2008, 2012, and 2014  
284 questionnaires. We defined inadequate sleep duration as five hours or less per night, as in other  
285 NHS studies.<sup>39</sup> We calculated the mediation proportion and its 95% CI by comparing the exposure  
286 effect estimate from the full model that includes the exposure, a potential intermediate variable,  
287 and any covariates with the exposure effect estimate obtained from a partial model that leaves out  
288 the intermediate variable. The mediation proportion is the proportion of increased CVD risk  
289 explained by higher exposure to noise that can be attributed to inadequate sleep. Confidence  
290 intervals for the mediation proportion were calculated using the data duplication method.<sup>40</sup>  
291 Mediation analyses assumed that there was no unmeasured exposure–outcome confounding, no  
292 unmeasured mediator–outcome confounding, no unmeasured exposure–mediator confounding,  
293 and no mediator–outcome confounder affected by exposure. Although these assumptions are  
294 unverifiable, we included major confounders in our mediation analyses, and therefore, we believe  
295 our assumptions are reasonable. All analyses were conducted in SAS, version 9.4.

## 296 297 **Results**

298 We observed 10,331 total CVD cases over 2,544,035 person-years of follow-up among the  
299 114,116 eligible cohort members from 1988-2018. In cause-specific analyses, we observed 5,321  
300 CHD cases and 5,010 stroke cases, of which, 1,929 were ischemic and 553 were hemorrhagic  
301 stroke, and 2,528 were unspecified. The mean age over follow-up was 67.6 years (**Table 1**).

302 Participants were predominantly white and lived in the Northeastern US. Those living in areas  
303 with higher levels of nighttime noise lived in areas with higher population density, higher levels  
304 of air pollution, and were less likely to be white. Nighttime and daytime noise were correlated  
305 (0.73) and weakly correlated with other environmental variables (**Figure S1**).

306  
307 The associations between nighttime noise and CVD, CHD, and stroke (total or subtype-specific)  
308 risks are shown in **Table 2**. Each interquartile range increase in L<sub>50</sub> nighttime noise (3.67 dBA)  
309 was associated with an HR of 1.04 (95% CI 1.02, 1.06) in fully adjusted models for CVD. Overall  
310 nighttime noise and CVD results were driven primarily by CHD (HR 1.05 [95% CI 1.02, 1.09]),  
311 as opposed to stroke (HR 1.02 [95% CI 0.99, 1.06]). Ischemic stroke and hemorrhagic stroke  
312 findings were not statistically significant, although there was a suggestive positive association of  
313 nighttime noise with hemorrhagic stroke (HR 1.08 [95% CI 0.98, 1.19]). Similar patterns were  
314 observed in analyses of L<sub>50</sub> daytime noise.

315  
316 Stratified analyses showed that associations of stroke with nighttime noise varied by population  
317 density (**Figure S2; Table S1**). We observed positive associations for stroke among those living  
318 in census tracts with <1000 people per mile<sup>2</sup> and null association of nighttime noise with stroke  
319 among those living in census tracts with ≥1000 people per mile<sup>2</sup> (p for interaction = 0.03).  
320 Nighttime and daytime noise associations with CVD outcomes did not significantly differ by all  
321 other prespecified effect modifiers (**Figure S3; Table S2**).

322  
323 In sensitivity analyses, HR for nighttime and daytime noise with CVD were slightly smaller in  
324 prespecified analyses restricted to 2000-2018 follow-up (**Table S3; Table S4**). We found no  
325 appreciable difference in associations when time-varying statin use or aspirin use was added to  
326 fully adjusted models (**Table S5; Table S6**). The impact of adjustment for physical activity in  
327 fully adjusted models, which may be considered a mediator of the association between noise  
328 exposure and cardiometabolic diseases,<sup>41</sup> resulted in no change in associations. Finally,  
329 additionally adjusting models for population density resulted in slightly stronger associations of  
330 nighttime (HR 1.06 [95% CI 1.03, 1.09]) and daytime (HR 1.07 [95% CI 1.03, 1.10]) noise with  
331 CHD, however, we chose not to adjust for population density in our main fully-adjusted model as  
332 it was a predictor used in NPS modelling of noise exposure.

333  
334 Mediation analyses showed no evidence that the association of nighttime noise and CVD risk was  
335 mediated by inadequate sleep duration, defined as self-reported five hours or less of sleep per night  
336 (**Table S7**).

## 337 **Discussion**

338  
339 In this nationwide prospective analysis of female nurses, we observed small positive associations  
340 of nighttime and daytime noise exposure with total CVD (nighttime HR 1.04 [95% CI 1.02, 1.06];  
341 daytime HR 1.04 [95% CI 1.02, 1.07]) that were robust to adjustment for important CVD risk  
342 factors. CVD associations were slightly stronger for CHD than CVD (CHD and stroke, combined).  
343 Associations of noise with CVD did not substantially differ by prespecified effect modifiers. We  
344 did not observe evidence that the relationship between noise and CVD risk was mediated by self-  
345 inadequate sleep duration.

346



347 Our findings were generally consistent with previous analyses of environmental noise exposure  
348 and CVD. In 2018, the WHO stated that high-quality and moderate-quality evidence was available  
349 to conclude that road traffic noise increased the risk of CHD and stroke, respectively.<sup>24</sup> Since the  
350 2018 WHO publication, evidence on noise and stroke has shown mixed findings and a 2021  
351 publication called for further assessment of noise and stroke subtypes, specifically ischemic stroke,  
352 using richly-contextualized, individual-level longitudinal studies.<sup>4</sup> We did not find evidence of an  
353 association of noise and ischemic stroke in the NHS. In agreement with other cohort studies, our  
354 study found increased risk of CHD (non-fatal MI or fatal CHD) associated with noise, but small  
355 or insignificant associations for stroke or stroke-subtypes.<sup>22,23,42</sup> Similarly, a UK Biobank cohort  
356 study found suggestive positive associations of traffic noise with acute coronary events (including  
357 MI), after adjustment for confounders (HR 1.03 [95% CI 0.99, 1.08]), but found no evidence for  
358 stroke or stroke subtypes.<sup>22</sup>

359  
360 An analysis of 2009 Medicare data on adults older than 65 living around airports in the US linked  
361 to Federal Aviation Administration aircraft noise contour data found that a 10 dBA higher aircraft  
362 noise exposure at the zip code level was associated with higher cardiovascular hospital admission  
363 rate (3.5% [95% CI 0.2%, 7.0%]), after controlling for age, sex, race, zip code level socioeconomic  
364 status and demographics, zip code level air pollution (PM<sub>2.5</sub> and ozone), and roadway density.<sup>43</sup>  
365 Additionally, a 2022 US study examined the relationship of airport noise at airport-adjacent  
366 residential address and hypertension, an important risk factor for CHD and stroke, and found  
367 suggestive evidence of a positive association.<sup>44</sup> Our study is the first to provide longitudinal,  
368 individual-level evidence of associations of anthropogenic noise (from multiple sources including  
369 traffic, aircraft, industry, etc.) with total CVD (CHD and stroke), CHD, and stroke.

370  
371 There is no reason to believe that the biological pathways mediating effects of noise on human  
372 health differ in US citizens compared to those from other countries, however, US-based evidence  
373 is crucial. Although associations of CVD with anthropogenic noise in our study were small, a 4%  
374 increased risk per interquartile range increase could be an important long term risk factor for CVD  
375 because such a large percentage of the population is exposed. In addition, this 4% increase is likely  
376 an underestimate due to potential non-differential exposure measurement error. More refined noise  
377 exposure models with higher spatial resolution in urban areas (i.e., with greater exposure contrast  
378 among addresses in loudest areas) may result in stronger associations with CVD outcomes. Indeed,  
379 a Swiss cohort study showed that reducing exposure measurement error by modelling traffic noise  
380 using high spatiotemporal resolution inputs compared to lower resolution inputs resulted in  
381 stronger associations with MI.<sup>45</sup> US noise models could be improved by using sound propagation  
382 models that incorporate reflection, diffraction, and absorption by sound barriers (e.g.  
383 buildings).<sup>15,18,46</sup> Development of a US source-specific (e.g., traffic) noise model with high spatial  
384 resolution inputs will be important in future analyses for accurately estimating health effects of  
385 noise and providing policy-relevant evidence.

386  
387 This study has limitations. Firstly, the nationwide noise model approximated outdoor noise  
388 exposure at a 270 m x 270 m resolution, which may not accurately capture noise variability over  
389 fine spatial scales, particularly in urban environments that have high variability in emissions,  
390 reflection, diffraction, and absorption.<sup>45</sup> While our predictions of outdoor noise contained  
391 measurement error, the noise model performed well in cross-validation ( $R^2 \geq 0.8$ ).<sup>32</sup> In addition,  
392 while information on changes in residential address were incorporated over follow-up, the noise

393 model surface did not vary over time. Due to using long-term average noise predictions (2000-  
394 2014), we back-extrapolated the time-invariant exposure to biennially updated addresses between  
395 1988-1999, which could result in exposure misclassification; however, in sensitivity analyses we  
396 found similar associations with slightly larger confidence intervals when using 2000 as a baseline,  
397 potentially arising from substantial participant exclusions due to prior CVD before 2000. Another  
398 limitation is that we could not measure factors that might alter individual noise exposure, such as  
399 housing quality or noise in the indoor environment. Also, our noise model did not differentiate  
400 between specific sources of sound, including road traffic, airports, and industrial land uses. For  
401 these reasons, there was likely unsystematic, nondifferential error in measurement of true exposure  
402 to noise which may bias our observed associations towards the null.

403  
404 With any study of neighborhood factors and health, there is a possibility that participants may self-  
405 select into certain neighborhoods they deem healthier than others. Therefore, healthier individuals  
406 may have chosen to move to neighborhoods with lower levels of noise, which may explain our  
407 findings. However, adjustment for multiple CVD risk factors along with our prospective analysis  
408 of incident CVD would decrease the potential for this type of bias and a study has demonstrated  
409 residential self-selection is not a major concern in NHS.<sup>47</sup> We did not find evidence of effect  
410 mediation by short sleep duration, however, humans react to environmental sounds while asleep<sup>3,48</sup>  
411 and, irrespective of sleep impairment and cognitive perception of noise,<sup>49</sup> nighttime noise has been  
412 shown in experimental studies to induce both endothelial dysfunction and prothrombotic  
413 inflammatory changes to the plasma proteome in healthy individuals.<sup>50,51</sup> Therefore self-reported  
414 short sleep duration may not adequately capture the breadth of potential effects of nighttime noise  
415 on CVD risk. Because all participants were female nurses at enrollment, the generalizability of our  
416 findings to males and lower SES, non-working groups is also potentially limited. Finally, although  
417 we adjusted for numerous risk factors for CVD, we cannot rule out the possibility that other factors  
418 that are correlated with noise might explain the observed association between noise exposure and  
419 CVD risk.

420  
421 This analysis has several strengths. Firstly, this nationwide, 30-year prospective analysis included  
422 residence-level metrics of exposure to nighttime and daytime noise with medical record confirmed  
423 or participant/medical professional corroborated CVD endpoints. Secondly, our analyses  
424 incorporated time-varying individual-level information on important CVD risk factors, including  
425 smoking, family history of MI, diet, menopausal status, postmenopausal hormone use, BMI, night  
426 shift work, as well as area-level data on neighborhood SES, region, and residential greenness, and  
427 air pollution. Because of the breadth of information available in the NHS cohort, we were able to  
428 conduct stratified analyses, as well as to examine potential mediation of the noise and CVD  
429 relationship by short sleep duration. Finally, this nationwide study covered a broad geographic  
430 region with a considerable range of noise levels and included participants residing in high and low  
431 population density areas of the US, which increases the generalizability of findings. A strength of  
432 the noise model used in this study was the extensive noise monitoring in rural areas, near national  
433 parks,<sup>52</sup> which allowed for well-validated prediction of noise in rural locations and, in turn, a  
434 nationwide analysis that included predictions of noise at low levels. This contrasts the noise models  
435 used in European epidemiological analyses, which assign a standard minimum noise level (e.g.  
436 20dBA) due to limited monitoring and/or traffic data availability in rural areas.<sup>15,46</sup>  
437

438 This prospective study, conducted over 30 years of follow-up with objective measures of  
439 anthropogenic nighttime and daytime noise across the entire US, provides evidence that nighttime  
440 noise was modestly associated with CVD incidence and nighttime and daytime noise was  
441 associated with incident CHD, after accounting for individual and area-level risk factors for CVD.

## **Tables and Figures**

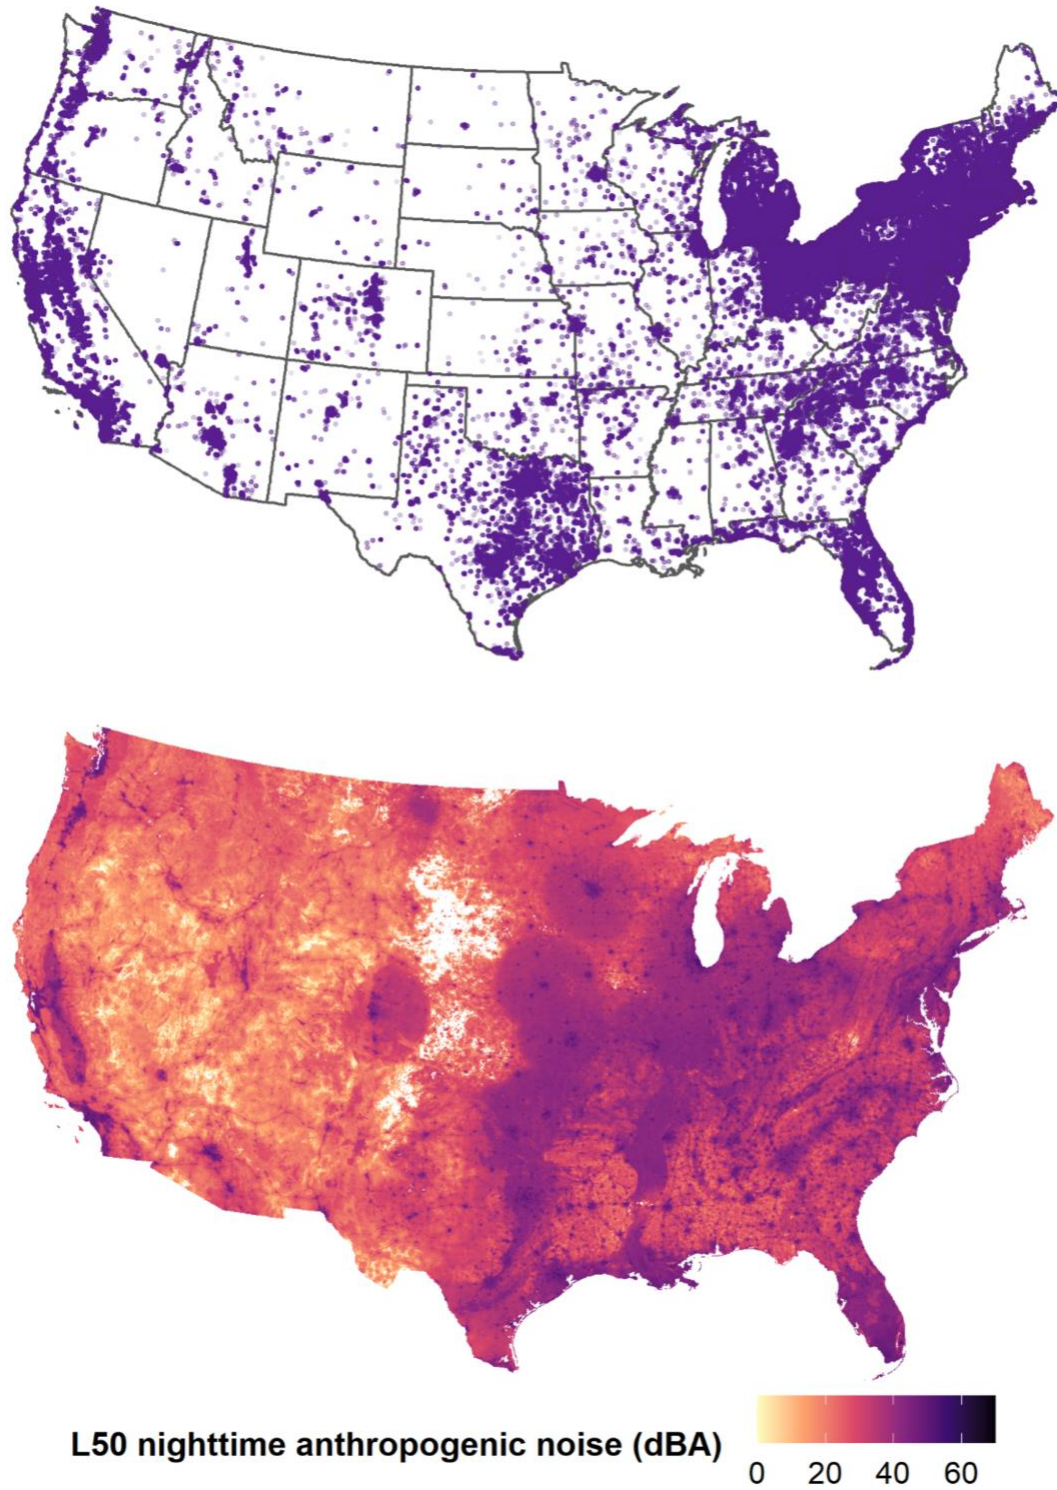

**Figure 1. Location of NHS Addresses from 1988-2018 (above) and Map of Anthropogenic Nighttime L<sub>50</sub> (Median) Sound (dBA) in 2000-2014 (below).**

**Table 1. Age-Adjusted Nurses' Health Study Participant Characteristics by Quintiles of Nighttime Anthropogenic L<sub>50</sub> dBA from 1988-2018 (n = 114,116; averaged over 2,544,035 person-years).**

| Characteristic                              | Total          | Nighttime L <sub>50</sub> dBA Quintile 1 | Nighttime L <sub>50</sub> dBA Quintile 2 | Nighttime L <sub>50</sub> dBA Quintile 3 | Nighttime L <sub>50</sub> dBA Quintile 4 | Nighttime L <sub>50</sub> dBA Quintile 5 |
|---------------------------------------------|----------------|------------------------------------------|------------------------------------------|------------------------------------------|------------------------------------------|------------------------------------------|
|                                             | Mean (SD) or % | Mean (SD) or %                           | Mean (SD) or %                           | Mean (SD) or %                           | Mean (SD) or %                           | Mean (SD) or %                           |
| L <sub>50</sub> dBA anthropogenic nighttime | 43.0 (3.5)     | 37.9 (3.5)                               | 41.9 (0.6)                               | 43.3 (0.4)                               | 44.7 (0.5)                               | 47.1 (1.3)                               |
| L <sub>50</sub> dBA anthropogenic daytime   | 46.1 (4.2)     | 40.8 (4.7)                               | 45.2 (2.4)                               | 47.1 (2.1)                               | 48.2 (2.1)                               | 49.3 (2.5)                               |
| Age (years)*                                | 67.6 (10.6)    | 67.0 (10.7)                              | 67.3 (10.6)                              | 67.5 (10.6)                              | 67.9 (10.5)                              | 68.1 (10.5)                              |
| White (%)                                   | 94             | 96                                       | 96                                       | 94                                       | 93                                       | 90                                       |
| Alternative Healthy Eating Index            | 51.6 (10.2)    | 51.6 (10.2)                              | 51.3 (10.1)                              | 51.6 (10.2)                              | 52.0 (10.2)                              | 51.8 (10.1)                              |
| Alcohol categories (%)                      |                |                                          |                                          |                                          |                                          |                                          |
| 0 grams/day                                 | 29             | 30                                       | 29                                       | 28                                       | 27                                       | 29                                       |
| 0.1-4.9 grams/day                           | 19             | 19                                       | 19                                       | 19                                       | 19                                       | 18                                       |
| 5.0-14.9 grams/day                          | 12             | 12                                       | 12                                       | 13                                       | 12                                       | 11                                       |
| ≥ 15 grams/day                              | 8              | 8                                        | 8                                        | 8                                        | 8                                        | 7                                        |
| Missing                                     | 32             | 30                                       | 31                                       | 32                                       | 33                                       | 35                                       |
| Body Mass Index categories (%)              |                |                                          |                                          |                                          |                                          |                                          |
| Normal/Underweight                          | 41             | 41                                       | 41                                       | 42                                       | 42                                       | 39                                       |
| Overweight                                  | 29             | 30                                       | 30                                       | 29                                       | 28                                       | 29                                       |
| Obese                                       | 19             | 19                                       | 19                                       | 18                                       | 18                                       | 19                                       |
| Missing                                     | 11             | 10                                       | 10                                       | 11                                       | 12                                       | 13                                       |
| Smoking Status (%)                          |                |                                          |                                          |                                          |                                          |                                          |
| Never smoker                                | 45             | 45                                       | 45                                       | 44                                       | 45                                       | 46                                       |
| Past smoker                                 | 43             | 43                                       | 43                                       | 43                                       | 43                                       | 41                                       |
| Current smoker                              | 10             | 9                                        | 10                                       | 10                                       | 9                                        | 10                                       |
| Missing                                     | 3              | 2                                        | 2                                        | 2                                        | 3                                        | 3                                        |
| Pack years of smoking                       | 11.7 (18.6)    | 11.7 (18.5)                              | 11.8 (18.5)                              | 12.1 (18.9)                              | 11.6 (18.7)                              | 11.3 (18.6)                              |
| Have RN degree (%)                          | 74             | 76                                       | 75                                       | 74                                       | 73                                       | 72                                       |
| Married (%)                                 | 63             | 66                                       | 65                                       | 64                                       | 62                                       | 60                                       |
| Husband's Highest Education (%)             |                |                                          |                                          |                                          |                                          |                                          |
| < high school                               | 4              | 4                                        | 4                                        | 3                                        | 3                                        | 4                                        |
| high school grad                            | 26             | 29                                       | 28                                       | 25                                       | 23                                       | 25                                       |
| > high school education                     | 37             | 35                                       | 36                                       | 38                                       | 39                                       | 35                                       |
| Missing or not married                      | 34             | 31                                       | 32                                       | 33                                       | 35                                       | 37                                       |
| Housewife mother (%)                        | 64             | 63                                       | 64                                       | 64                                       | 64                                       | 64                                       |
| Professional or manager father, %           | 26             | 25                                       | 25                                       | 26                                       | 27                                       | 25                                       |
| Family History of MI (%)                    | 26             | 26                                       | 27                                       | 26                                       | 26                                       | 25                                       |
| Menopausal status (%)                       |                |                                          |                                          |                                          |                                          |                                          |

|                                                                 |             |             |             |             |             |             |
|-----------------------------------------------------------------|-------------|-------------|-------------|-------------|-------------|-------------|
| Premenopausal or missing                                        | 44          | 46          | 44          | 44          | 43          | 43          |
| Postmenopausal                                                  | 56          | 54          | 56          | 56          | 57          | 57          |
| Postmenopausal hormone use (%)                                  |             |             |             |             |             |             |
| Premenopausal                                                   | 8           | 8           | 8           | 8           | 8           | 8           |
| Never                                                           | 21          | 22          | 21          | 21          | 20          | 19          |
| Current                                                         | 22          | 21          | 21          | 22          | 23          | 23          |
| Former                                                          | 33          | 34          | 34          | 34          | 33          | 32          |
| Missing                                                         | 16          | 15          | 16          | 16          | 17          | 18          |
| Night Shift Work                                                |             |             |             |             |             |             |
| Never (%)                                                       | 31          | 32          | 30          | 31          | 30          | 30          |
| 1-14 years shift work (%)                                       | 39          | 39          | 40          | 39          | 39          | 37          |
| 15-29 years shift work (%)                                      | 4           | 4           | 4           | 4           | 4           | 4           |
| 30+ years shift work (%)                                        | 1           | 1           | 1           | 1           | 1           | 1           |
| Missing shift work (%)                                          | 25          | 24          | 25          | 25          | 26          | 28          |
| Sleep <5 hours per night (%)                                    | 6           | 6           | 6           | 6           | 6           | 7           |
| Cancer during follow-up (%)                                     | 7           | 7           | 7           | 7           | 8           | 7           |
| Population density $\geq 1000$ per mile <sup>2</sup> (%)        | 65          | 39          | 57          | 70          | 79          | 81          |
| Region (%)                                                      |             |             |             |             |             |             |
| Northeast                                                       | 45          | 58          | 55          | 46          | 37          | 31          |
| Midwest                                                         | 16          | 11          | 18          | 17          | 14          | 20          |
| South                                                           | 17          | 13          | 13          | 18          | 21          | 18          |
| West                                                            | 13          | 9           | 6           | 10          | 18          | 20          |
| 12-month average PM <sub>2.5</sub> ( $\mu\text{g}/\text{m}^3$ ) | 12.6 (4.6)  | 11.0 (4.1)  | 12.3 (4.3)  | 13.0 (4.5)  | 13.2 (4.7)  | 13.7 (5.0)  |
| 12-month average PM <sub>2.5</sub> Quintile (%)                 |             |             |             |             |             |             |
| Quintile 1                                                      | 20          | 35          | 19          | 15          | 16          | 15          |
| Quintile 2                                                      | 20          | 28          | 25          | 18          | 15          | 14          |
| Quintile 3                                                      | 20          | 18          | 23          | 22          | 20          | 18          |
| Quintile 4                                                      | 20          | 12          | 19          | 23          | 25          | 23          |
| Quintile 5                                                      | 20          | 7           | 15          | 22          | 25          | 31          |
| NDVI (in 270m distance buffer)                                  | 0.36 (0.17) | 0.39 (0.18) | 0.38 (0.17) | 0.37 (0.16) | 0.35 (0.15) | 0.33 (0.15) |
| NDVI Quintile (%)                                               |             |             |             |             |             |             |
| Quintile 1                                                      | 18          | 16          | 15          | 16          | 19          | 26          |
| Quintile 2                                                      | 19          | 16          | 17          | 19          | 20          | 21          |
| Quintile 3                                                      | 19          | 17          | 19          | 21          | 20          | 19          |
| Quintile 4                                                      | 19          | 19          | 21          | 21          | 19          | 16          |
| Quintile 5                                                      | 19          | 27          | 22          | 19          | 16          | 13          |
| Neighborhood SES (time-varying) Quintile (%)                    |             |             |             |             |             |             |
| Quintile 1                                                      | 20          | 31          | 24          | 17          | 14          | 16          |
| Quintile 2                                                      | 21          | 20          | 23          | 20          | 18          | 22          |
| Quintile 3                                                      | 23          | 21          | 22          | 23          | 22          | 24          |

|            |    |    |    |    |    |    |
|------------|----|----|----|----|----|----|
| Quintile 4 | 13 | 11 | 12 | 13 | 15 | 15 |
| Quintile 5 | 23 | 17 | 19 | 26 | 31 | 22 |

\* Value is not age-adjusted

**Table 2. Hazard ratios (HR) and 95% confidence intervals (CIs) for anthropogenic L<sub>50</sub> nighttime and anthropogenic L<sub>50</sub> daytime sound pressure (dBA) and cardiovascular disease incidence in the Nurses' Health Study from 1988 to 2018 (n = 114,116; person-years = 2,544,035). Total CVD (CHD or stroke), CHD, stroke, and stroke subtypes (ischemic and hemorrhagic stroke) are shown.**

|                                            | L <sub>50</sub> nighttime noise            |                             | L <sub>50</sub> daytime noise              |                             |
|--------------------------------------------|--------------------------------------------|-----------------------------|--------------------------------------------|-----------------------------|
|                                            | Age and Calendar Year Adjusted HR (95% CI) | Fully Adjusted* HR (95% CI) | Age and Calendar Year Adjusted HR (95% CI) | Fully Adjusted* HR (95% CI) |
| <b>CVD (n = 10,331)</b>                    | 1.01 (0.99, 1.03)                          | 1.04 (1.02, 1.06)           | 1.01 (0.99, 1.03)                          | 1.04 (1.02, 1.07)           |
| <b>CHD (n = 5,321)</b>                     | 1.02 (1.00, 1.05)                          | 1.05 (1.02, 1.09)           | 1.02 (0.99, 1.05)                          | 1.06 (1.02, 1.09)           |
| <b>Stroke (n = 5,010)</b>                  | 1.00 (0.97, 1.02)                          | 1.02 (0.99, 1.06)           | 1.00 (0.97, 1.03)                          | 1.03 (1.00, 1.06)           |
| <b><i>Ischemic stroke (n = 1,929)</i></b>  | 0.96 (0.92, 1.01)                          | 1.00 (0.96, 1.05)           | 0.98 (0.93, 1.02)                          | 1.04 (0.99, 1.09)           |
| <b><i>Hemorrhagic stroke (n = 553)</i></b> | 1.07 (0.98, 1.18)                          | 1.08 (0.98, 1.19)           | 1.08 (0.99, 1.18)                          | 1.10 (0.99, 1.21)           |

\* Hazard ratios are adjusted for age and calendar year, race, smoking status, pack-years smoked, family history of MI, menopausal status, postmenopausal hormone use, diet, alcohol consumption, BMI, night shift work, parental occupation, educational attainment (RN degree), marital status, husband's highest education, nSES score quintile, region, and air pollution (PM<sub>2.5</sub>). Note: IQR for anthropogenic L<sub>50</sub> nighttime sound: 3.67 dBA; IQR for anthropogenic L<sub>50</sub> daytime sound: 4.35 dBA.



## References

1. Babisch W, Pershagen G, Selander J, et al. Noise annoyance — A modifier of the association between noise level and cardiovascular health? *Sci Total Environ*. 2013;452-453:50-57. doi:10.1016/j.scitotenv.2013.02.034
2. Basner M, Babisch W, Davis A, et al. Auditory and non-auditory effects of noise on health. *The Lancet*. 2014;383(9925):1325-1332. doi:10.1016/S0140-6736(13)61613-X
3. van Kamp I, Simon S, Notley H, Baliatsas C, van Kempen E. Evidence Relating to Environmental Noise Exposure and Annoyance, Sleep Disturbance, Cardio-Vascular and Metabolic Health Outcomes in the Context of IGCB (N): A Scoping Review of New Evidence. *Int J Environ Res Public Health*. 2020;17(9). doi:10.3390/ijerph17093016
4. Münzel T, Sørensen M, Daiber A. Transportation noise pollution and cardiovascular disease. *Nat Rev Cardiol*. 2021;18(9):619-636. doi:10.1038/s41569-021-00532-5
5. Babisch W. Transportation noise and cardiovascular risk: Updated Review and synthesis of epidemiological studies indicate that the evidence has increased. *Noise Health*. 2006;8(30):1-29.
6. Babisch W. Stress hormones in the research on cardiovascular effects of noise. *Noise Health*. 2003;5(18):1.
7. Biel R, Danieli C, Shekarrizfard M, et al. Acute cardiovascular health effects in a panel study of personal exposure to traffic-related air pollutants and noise in Toronto, Canada. *Sci Rep*. 2020;10(1):16703. doi:10.1038/s41598-020-73412-6
8. Münzel T, Gori T, Babisch W, Basner M. Cardiovascular effects of environmental noise exposure. *Eur Heart J*. 2014;35(13):829-836. doi:10.1093/eurheartj/ehu030
9. Lercher P. Environmental noise and health: An integrated research perspective. *Environ Int*. 1996;22(1):117-129.
10. Eriksson C, Pershagen G, Nilsson M. *Biological Mechanisms Related to Cardiovascular and Metabolic Effects by Environmental Noise*. World Health Organization. Regional Office for Europe; 2018. <https://apps.who.int/iris/handle/10665/346548>
11. Hennig F, Moebus S, Reinsch N, et al. Investigation of air pollution and noise on progression of thoracic aortic calcification: results of the Heinz Nixdorf Recall Study. *Eur J Prev Cardiol*. 2020;27(9):965-974. doi:10.1177/2047487319854818
12. Osborne MT, Radfar A, Hassan MZO, et al. A neurobiological mechanism linking transportation noise to cardiovascular disease in humans. *Eur Heart J*. 2020;41(6):772-782. doi:10.1093/eurheartj/ehz820
13. Babisch W, Ising H, Gallacher JEJ, Sweetnam PM, Elwood PC. Traffic Noise and Cardiovascular Risk: The Caerphilly and Speedwell Studies, Third Phase-10-Year Follow Up. *Arch Environ Health Int J*. 1999;54(3):210-216. doi:10.1080/00039899909602261

14. Héritier H, Vienneau D, Foraster M, et al. Diurnal variability of transportation noise exposure and cardiovascular mortality: A nationwide cohort study from Switzerland. *Int J Hyg Environ Health*. 2018;221(3):556-563. doi:10.1016/j.ijheh.2018.02.005
15. Roswall N, Poulsen AH, Thacher JD, et al. Nighttime road traffic noise exposure at the least and most exposed façades and sleep medication prescription redemption—a Danish cohort study. *Sleep*. 2020;43(8). doi:10.1093/sleep/zsaa029
16. Sørensen M, Andersen ZJ, Nordsborg RB, et al. Road Traffic Noise and Incident Myocardial Infarction: A Prospective Cohort Study. *PLOS ONE*. 2012;7(6):e39283. doi:10.1371/journal.pone.0039283
17. Sørensen M, Hvidberg M, Andersen ZJ, et al. Road traffic noise and stroke: a prospective cohort study. *Eur Heart J*. 2011;32(6):737-744. doi:10.1093/eurheartj/ehq466
18. Pyko A, Roswall N, Ögren M, et al. Long-Term Exposure to Transportation Noise and Ischemic Heart Disease: A Pooled Analysis of Nine Scandinavian Cohorts. *Environ Health Perspect*. 2023;131(1):017003. doi:10.1289/EHP10745
19. Gan WQ, Davies HW, Koehoorn M, Brauer M. Association of Long-term Exposure to Community Noise and Traffic-related Air Pollution With Coronary Heart Disease Mortality. *Am J Epidemiol*. 2012;175(9):898-906. doi:10.1093/aje/kwr424
20. Beelen R, Hoek G, Houthuijs D, et al. The joint association of air pollution and noise from road traffic with cardiovascular mortality in a cohort study. *Occup Environ Med*. 2009;66(4):243. doi:10.1136/oem.2008.042358
21. Bodin T, Björk J, Mattisson K, et al. Road traffic noise, air pollution and myocardial infarction: a prospective cohort study. *Int Arch Occup Environ Health*. 2016;89(5):793-802. doi:10.1007/s00420-016-1115-9
22. Cai Y, Hodgson S, Blangiardo M, et al. Road traffic noise, air pollution and incident cardiovascular disease: A joint analysis of the HUNT, EPIC-Oxford and UK Biobank cohorts. *Environ Int*. 2018;114:191-201. doi:10.1016/j.envint.2018.02.048
23. Pyko A, Andersson N, Eriksson C, et al. Long-term transportation noise exposure and incidence of ischaemic heart disease and stroke: a cohort study. *Occup Environ Med*. 2019;76(4):201. doi:10.1136/oemed-2018-105333
24. Van Kempen E, Casas M, Pershagen G, Foraster M. WHO Environmental Noise Guidelines for the European Region: A Systematic Review on Environmental Noise and Cardiovascular and Metabolic Effects: A Summary. *Int J Environ Res Public Health*. 2018;15(2). doi:10.3390/ijerph15020379
25. Münzel T, Kröller-Schön S, Oelze M, et al. Adverse Cardiovascular Effects of Traffic Noise with a Focus on Nighttime Noise and the New WHO Noise Guidelines. *Annu Rev Public Health*. 2020;41(1):309-328. doi:10.1146/annurev-publhealth-081519-062400
26. Casey JA, Morello-Frosch R, Mennitt DJ, Frstrup K, Ogburn EL, James P. Race/Ethnicity, Socioeconomic Status, Residential Segregation, and Spatial Variation in Noise Exposure in the Contiguous United States. *Environ Health Perspect*. 2017;125(7):077017. doi:10.1289/EHP898

27. Bao Y, Bertoa ML, Lenart EB, et al. Origin, Methods, and Evolution of the Three Nurses' Health Studies. *Am J Public Health*. 2016;106(9):1573-1581. doi:10.2105/AJPH.2016.303338
28. Kim CS, Grady ST, Hart JE, et al. Long-term aircraft noise exposure and risk of hypertension in the Nurses' Health Studies. *Environ Res*. Published online October 7, 2021:112195. doi:10.1016/j.envres.2021.112195
29. Elliott Elise G., Laden Francine, James Peter, Rimm Eric B., Rexrode Kathryn M., Hart Jaime E. Interaction between Long-Term Exposure to Fine Particulate Matter and Physical Activity, and Risk of Cardiovascular Disease and Overall Mortality in U.S. Women. *Environ Health Perspect*. 2020;128(12):127012. doi:10.1289/EHP7402
30. Hart JE, Puett RC, Rexrode KM, Albert CM, Laden F. Effect Modification of Long-Term Air Pollution Exposures and the Risk of Incident Cardiovascular Disease in US Women. *J Am Heart Assoc*. 2015;4(12):e002301. doi:10.1161/JAHA.115.002301
31. Shan Z, Li Y, Baden MY, et al. Association Between Healthy Eating Patterns and Risk of Cardiovascular Disease. *JAMA Intern Med*. 2020;180(8):1090-1100. doi:10.1001/jamainternmed.2020.2176
32. Mennitt D, Sherrill K, Fristrup K. A geospatial model of ambient sound pressure levels in the contiguous United States. *J Acoust Soc Am*. 2014;135(5):2746-2764. doi:10.1121/1.4870481
33. Mennitt DJ, Fristrup KM. Influence factors and spatiotemporal patterns of environmental sound levels in the contiguous United States. *Noise Control Eng J*. 2016;64(3):342-353. doi:10.3397/1/376384
34. Chiuve SE, Fung TT, Rimm EB, et al. Alternative Dietary Indices Both Strongly Predict Risk of Chronic Disease. *J Nutr*. 2012;142(6):1009-1018. doi:10.3945/jn.111.157222
35. Geolytics. Neighborhood Change Database—Normalized Data. Neighborhood Change Database. Published 2021. <https://geolytics.com/products/normalized-data/neighborhood-change-database>
36. DeVille NV, Iyer HS, Holland I, et al. Neighborhood socioeconomic status and mortality in the nurses' health study (NHS) and the nurses' health study II (NHSII). *Environ Epidemiol*. 2023;7(1). [https://journals.lww.com/environepidem/Fulltext/2023/02000/Neighborhood\\_socioeconomic\\_status\\_and\\_mortality\\_in.3.aspx](https://journals.lww.com/environepidem/Fulltext/2023/02000/Neighborhood_socioeconomic_status_and_mortality_in.3.aspx)
37. Yanosky JD, Paciorek CJ, Laden F, et al. Spatio-temporal modeling of particulate air pollution in the conterminous United States using geographic and meteorological predictors. *Environ Health*. 2014;13(1):63. doi:10.1186/1476-069X-13-63
38. Iyer HS, Hart JE, James P, et al. Impact of neighborhood socioeconomic status, income segregation, and greenness on blood biomarkers of inflammation. *Environ Int*. 2022;162:107164. doi:10.1016/j.envint.2022.107164
39. Ley SH, Ardisson Korat AV, Sun Q, et al. Contribution of the Nurses' Health Studies to Uncovering Risk Factors for Type 2 Diabetes: Diet, Lifestyle, Biomarkers, and Genetics. *Am J Public Health*. 2016;106(9):1624-1630. doi:10.2105/AJPH.2016.303314

40. Lin DY, Fleming TR, de Gruttola V. Estimating the proportion of treatment effect explained by a surrogate marker. *Stat Med.* 1997;16(13):1515-1527. doi:10.1002/(SICI)1097-0258(19970715)16:13<1515::AID-SIM572>3.0.CO;2-1
41. Foraster M, Eze IC, Vienneau D, et al. Long-term transportation noise annoyance is associated with subsequent lower levels of physical activity. *Environ Int.* 2016;91:341-349. doi:10.1016/j.envint.2016.03.011
42. Héritier H, Vienneau D, Foraster M, et al. Transportation noise exposure and cardiovascular mortality: a nationwide cohort study from Switzerland. *Eur J Epidemiol.* 2017;32(4):307-315. doi:10.1007/s10654-017-0234-2
43. Correia AW, Peters JL, Levy JI, Melly S, Dominici F. Residential exposure to aircraft noise and hospital admissions for cardiovascular diseases: multi-airport retrospective study. *BMJ.* 2013;347:f5561.
44. Kim CS, Grady ST, Hart JE, et al. Long-term aircraft noise exposure and risk of hypertension in the Nurses' Health Studies. *Environ Res.* Published online October 7, 2021:112195. doi:10.1016/j.envres.2021.112195
45. Vienneau D, Héritier H, Foraster M, et al. Façades, floors and maps – Influence of exposure measurement error on the association between transportation noise and myocardial infarction. *Environ Int.* 2019;123:399-406. doi:10.1016/j.envint.2018.12.015
46. Morley DW, de Hoogh K, Fecht D, et al. International scale implementation of the CNOSSOS-EU road traffic noise prediction model for epidemiological studies. *Environ Pollut.* 2015;206:332-341. doi:10.1016/j.envpol.2015.07.031
47. James P, Hart JE, Arcaya MC, Feskanich D, Laden F, Subramanian SV. Neighborhood Self-Selection: The Role of Pre-Move Health Factors on the Built and Socioeconomic Environment. *Int J Environ Res Public Health.* 2015;12(10):12489-12504. doi:10.3390/ijerph121012489
48. Oswald IAN, Taylor AM, Treisman M. Discriminative responses to stimulation during human sleep. *Brain J Neurol.* Published online 1960.
49. Thiesse L, Rudzik F, Kraemer JF, et al. Transportation noise impairs cardiovascular function without altering sleep: The importance of autonomic arousals. *Environ Res.* 2020;182:109086. doi:10.1016/j.envres.2019.109086
50. Herzog J, Schmidt FP, Hahad O, et al. Acute exposure to nocturnal train noise induces endothelial dysfunction and pro-thromboinflammatory changes of the plasma proteome in healthy subjects. *Basic Res Cardiol.* 2019;114(6):46. doi:10.1007/s00395-019-0753-y
51. Schmidt FP, Basner M, Kröger G, et al. Effect of nighttime aircraft noise exposure on endothelial function and stress hormone release in healthy adults. *Eur Heart J.* 2013;34(45):3508-3514. doi:10.1093/eurheartj/eh269
52. Buxton RT, McKenna MF, Mennitt D, et al. Noise pollution is pervasive in US protected areas. *Science.* 2017;356(6337):531-533.

## Supplementary material

This supplement provides results from: correlation (Figure S1); stratified analyses that correspond to Figure S2 and S3 (Tables S1 and S2); time-restricted Table 1 and Cox PH analyses with baseline in 2000 (Tables S3 and S4, respectively); and additional Table 1 variables for sensitivity analyses and Cox PH sensitivity analyses (Tables S5 and S6); mediation analyses (Table S7).

Figure S1. Spearman's rank correlation plot of nighttime anthropogenic  $L_{50}$  (median) sound (dBA), daytime anthropogenic  $L_{50}$  (median) sound (dBA), air pollution ( $PM_{2.5}$ ), greenness (NDVI), population density (Census population per square mile), and neighborhood socioeconomic status (z-score).

Figure S2. Stratified Analyses of Anthropogenic Nighttime  $L_{50}$  (Median) Sound (dBA) for CVD, CHD, and Stroke incidence in the Nurses' Health Study (n = 114,116; 1988-2018).

Figure S3. Stratified Analyses of Anthropogenic Daytime  $L_{50}$  (Median) Sound (dBA) for CVD, CHD, and Stroke incidence in the Nurses' Health Study (n = 114,116; 1988-2018).

Table S1. Nurses' Health Study Person-time, CVD, CHD, stroke cases and fully adjusted HR and 95% confidence intervals for nighttime anthropogenic  $L_{50}$  (median) sound (dBA) from 1988-2018 (n = 114,116) by stratifying variables (population density, region, air pollution, greenness, and neighborhood socioeconomic status).

Table S2. Nurses' Health Study Person-time, CVD, CHD, stroke cases and fully adjusted HR and 95% confidence intervals for daytime anthropogenic  $L_{50}$  (median) sound (dBA) from 1988-2018 (n = 114,116) by stratifying variables (population density, region, air pollution, greenness, and neighborhood socioeconomic status).

Table S3. Age-Adjusted Nurses' Health Study Participant Characteristics by Quintiles of Nighttime Anthropogenic  $L_{50}$  dBA from 2000-2018 (n = 95,225).

Table S4. Hazard ratios (HR) and 95% confidence intervals (CI) for anthropogenic  $L_{50}$  nighttime and anthropogenic  $L_{50}$  daytime sound pressure (dBA) and cardiovascular disease incidence in the Nurses' Health Study (n = 95,225; 2000-2018).

Table S5. Additional (for sensitivity analysis) Age-Adjusted Nurses' Health Study Participant Characteristics by Quintiles of Nighttime Anthropogenic  $L_{50}$  dBA from 1988-2018 (n = 114,116).

Table S6. Hazard ratios (HR) and 95% confidence intervals (CI) for anthropogenic  $L_{50}$  nighttime and anthropogenic  $L_{50}$  daytime sound pressure (dBA) and cardiovascular disease incidence in the Nurses' Health Study (n = 114,116; 1988-2018) with additional adjustment for comorbidities at baseline, statin use, aspirin use, physical activity, and population density.

Table S7. Estimated proportion of association of nighttime noise and CVD in the Nurses' Health Study explained by short self-reported sleep duration.

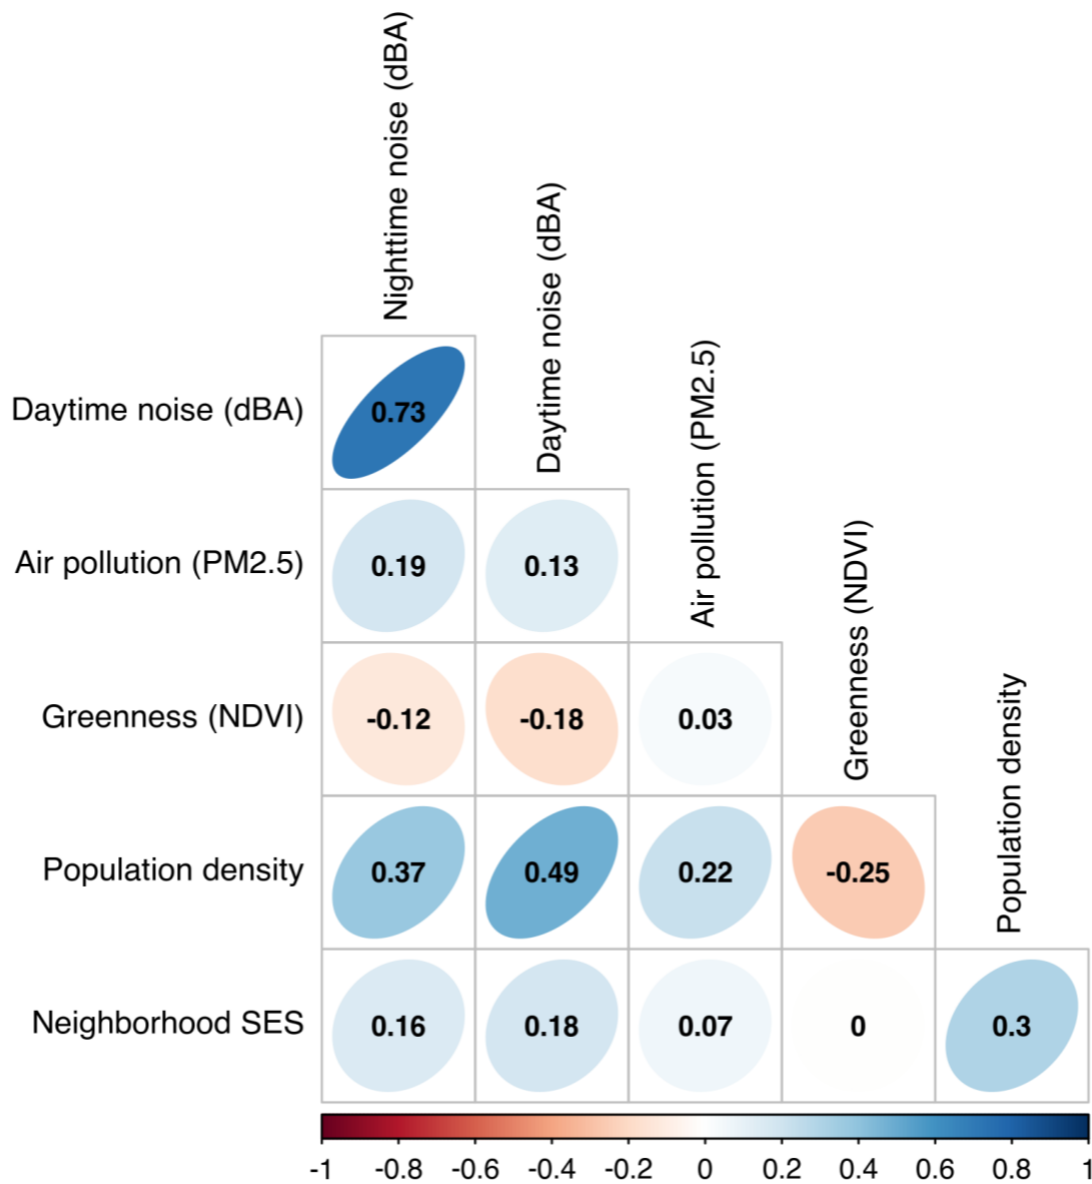

**Figure S1. Spearman's rank correlation plot of nighttime anthropogenic L<sub>50</sub> (median) sound (dBA), daytime anthropogenic L<sub>50</sub> (median) sound (dBA), air pollution (PM<sub>2.5</sub>), greenness (NDVI), population density (Census population per square mile), and neighborhood socioeconomic status (z-score). Correlation coefficients shown inside ellipses.**

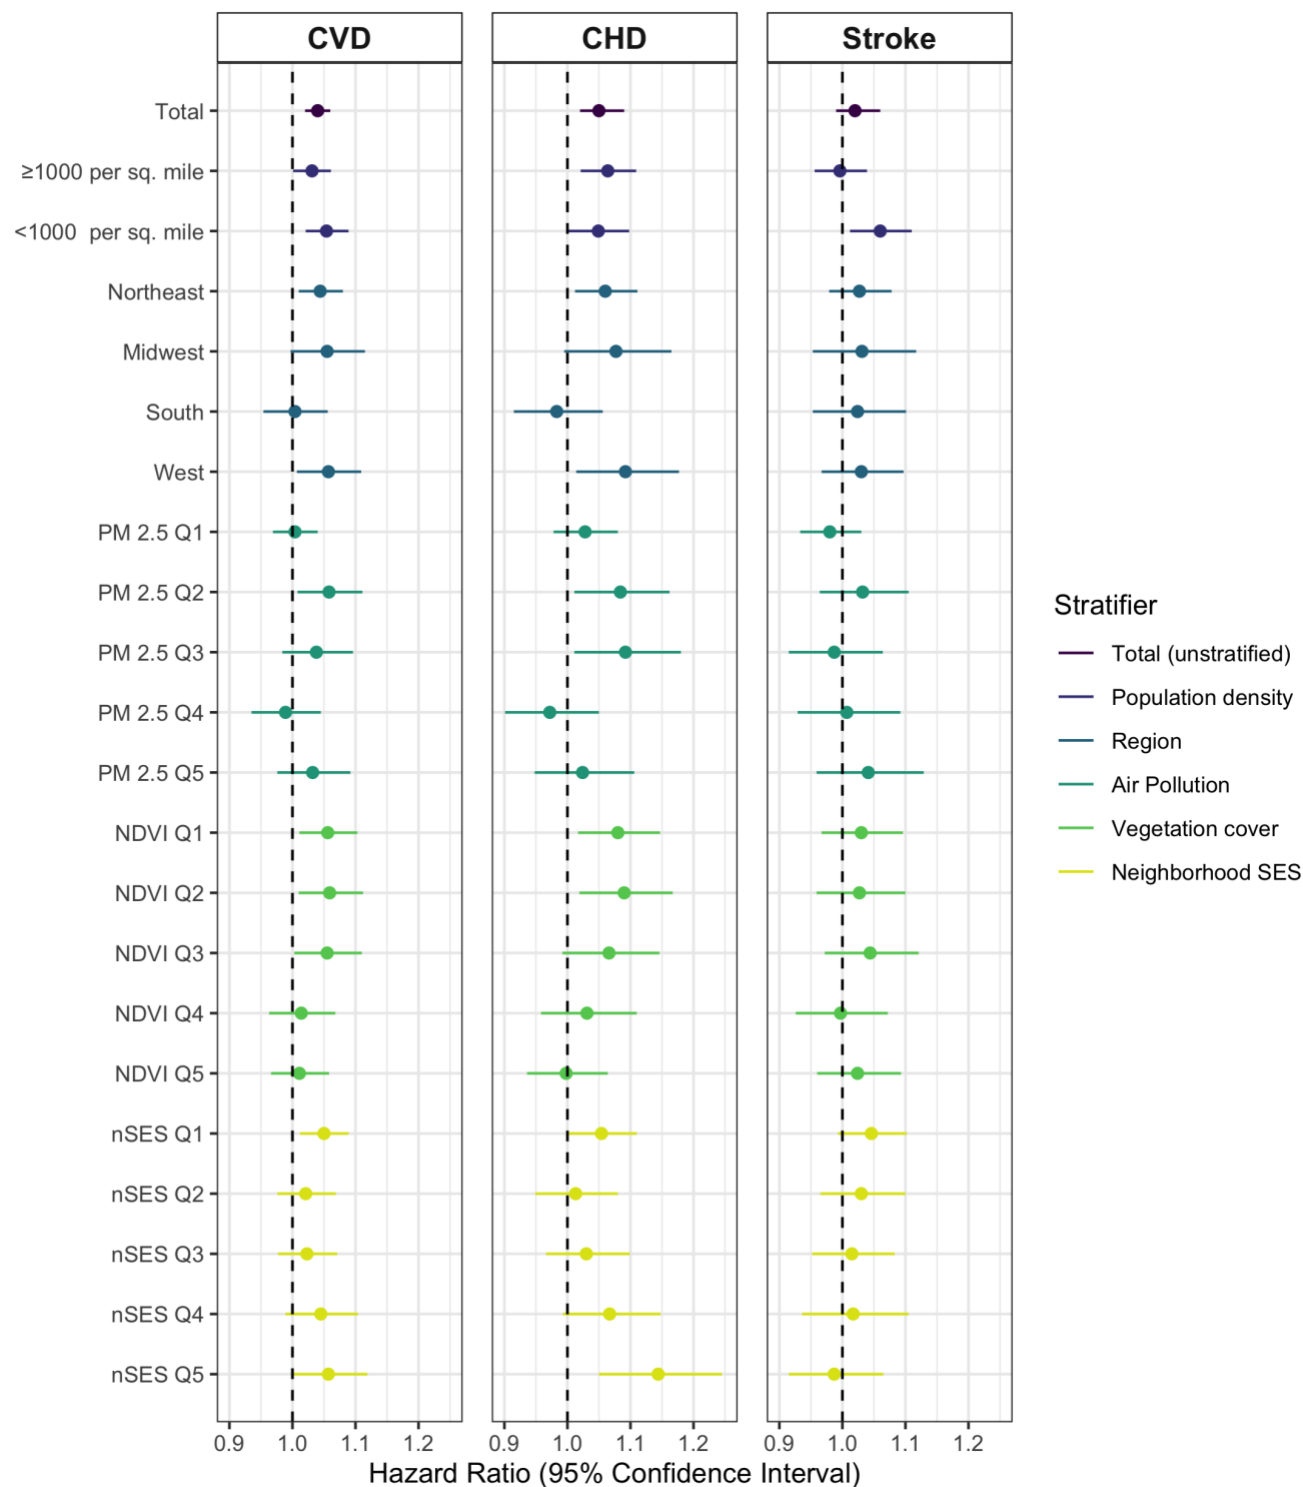

**Figure 2. Stratified Analyses of Anthropogenic Nighttime  $L_{50}$  (Median) Sound (dBA) for CVD, CHD, and Stroke incidence in the Nurses' Health Study (n = 114,116; 1988-2018).**

<sup>a</sup> Hazard ratios are adjusted for age and calendar year, race, smoking status, pack-years smoked, family history of MI, menopausal status, postmenopausal hormone use, diet, alcohol consumption, BMI, night shift work, parental occupation, educational attainment (RN degree), marital status, husband's highest education, neighborhood SES score, region, and air pollution ( $PM_{2.5}$ ). Stratifying variables are not adjusted in respective analyses. Note: IQR for anthropogenic  $L_{50}$  nighttime sound: 3.67 dBA.

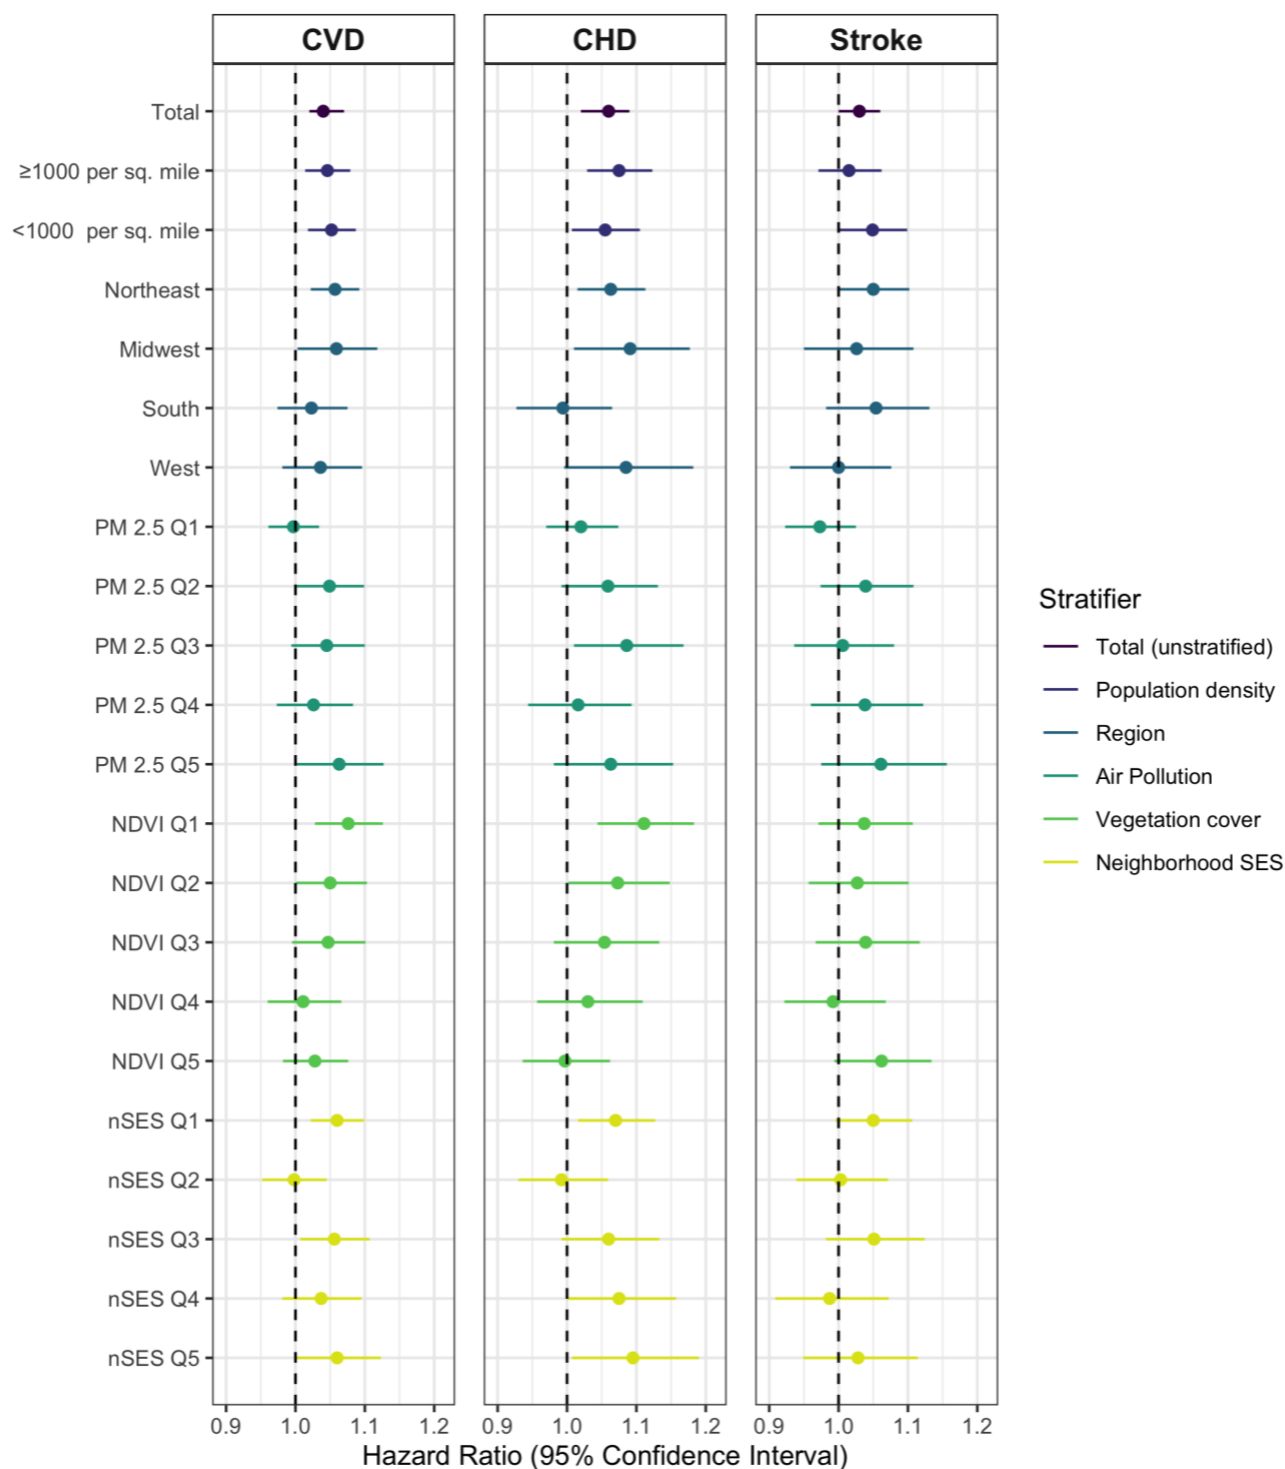

**Figure 3. Stratified Analyses of Anthropogenic Daytime L<sub>50</sub> (Median) Sound (dBA) for CVD, CHD, and Stroke incidence in the Nurses' Health Study (n = 114,116; 1988-2018).**

<sup>a</sup> Hazard ratios are adjusted for age and calendar year, race, smoking status, pack-years smoked, family history of MI, menopausal status, postmenopausal hormone use, diet, alcohol consumption, BMI, night shift work, parental occupation, educational attainment (RN degree), marital status, husband's highest education, neighborhood SES score, region, and air pollution (PM<sub>2.5</sub>). Stratifying variables are not adjusted in respective analyses. Note: IQR for anthropogenic L<sub>50</sub> daytime sound: 4.35 dBA.



**Table S1. Nurses' Health Study Person-time, CVD, MI, stroke cases and fully adjusted HR and 95% confidence intervals for nighttime anthropogenic L<sub>50</sub> (median) sound (dBA) from 1988-2018 (n = 114,116) by prespecified stratifying variables.**

|                                    | Person-time | CVD cases | CHD cases | Stroke cases | CVD Fully Adjusted <sup>a</sup> HR (95% CI) | CHD Fully Adjusted <sup>a</sup> HR (95% CI) | Stroke Fully Adjusted <sup>a</sup> HR (95% CI) |
|------------------------------------|-------------|-----------|-----------|--------------|---------------------------------------------|---------------------------------------------|------------------------------------------------|
| Total (unstratified)               | 2,544,035   | 10,331    | 5,321     | 5,010        | 1.04 (1.02, 1.06)                           | 1.05 (1.02, 1.09)                           | 1.02 (0.99, 1.06)                              |
| Population density                 |             |           |           |              |                                             |                                             |                                                |
| ≥1000 people per mile <sup>2</sup> | 1,652,688   | 6,828     | 3,548     | 3,280        | 1.03 (1.00, 1.06)                           | 1.06 (1.02, 1.11)                           | 1.00 (0.96, 1.04)                              |
| <1000 people per mile <sup>2</sup> | 891,348     | 3,503     | 1,773     | 1,730        | 1.05 (1.02, 1.09)                           | 1.05 (1.00, 1.10)                           | 1.06 (1.01, 1.11)                              |
| <i>p-for-interaction</i>           |             |           |           |              | 0.17                                        | 0.54                                        | 0.03                                           |
| Region                             |             |           |           |              |                                             |                                             |                                                |
| Northeast                          | 1,157,696   | 4,457     | 2,320     | 2,137        | 1.04 (1.01, 1.08)                           | 1.06 (1.01, 1.11)                           | 1.03 (0.98, 1.08)                              |
| Midwest                            | 405,844     | 1,582     | 815       | 767          | 1.05 (1.00, 1.12)                           | 1.08 (0.99, 1.17)                           | 1.03 (0.95, 1.12)                              |
| South                              | 421,149     | 1,692     | 831       | 861          | 1.00 (0.95, 1.06)                           | 0.98 (0.92, 1.06)                           | 1.02 (0.95, 1.10)                              |
| West                               | 319,628     | 1,345     | 607       | 738          | 1.06 (1.01, 1.11)                           | 1.09 (1.01, 1.18)                           | 1.03 (0.97, 1.10)                              |
| <i>p-for-interaction</i>           |             |           |           |              | 0.25                                        | 0.16                                        | 0.48                                           |
| Air pollution PM <sub>2.5</sub>    |             |           |           |              |                                             |                                             |                                                |
| Quintile 1                         | 508,998     | 2,066     | 1,082     | 984          | 1.00 (0.97, 1.04)                           | 1.03 (0.98, 1.08)                           | 0.98 (0.93, 1.03)                              |
| Quintile 2                         | 510,635     | 2,027     | 1,009     | 1,018        | 1.06 (1.01, 1.11)                           | 1.08 (1.01, 1.16)                           | 1.03 (0.96, 1.10)                              |
| Quintile 3                         | 510,407     | 2,021     | 1,021     | 1,000        | 1.04 (0.98, 1.10)                           | 1.09 (1.01, 1.18)                           | 0.99 (0.92, 1.06)                              |
| Quintile 4                         | 509,846     | 2,063     | 1,079     | 984          | 0.99 (0.94, 1.05)                           | 0.97 (0.90, 1.05)                           | 1.01 (0.93, 1.09)                              |
| Quintile 5                         | 504,151     | 2,154     | 1,130     | 1,024        | 1.03 (0.98, 1.09)                           | 1.02 (0.95, 1.11)                           | 1.04 (0.96, 1.13)                              |
| <i>p-for-interaction</i>           |             |           |           |              | 0.22                                        | 0.16                                        | 0.48                                           |
| Greenness NDVI                     |             |           |           |              |                                             |                                             |                                                |
| Quintile 1                         | 470,012     | 2,069     | 1,112     | 957          | 1.06 (1.01, 1.10)                           | 1.08 (1.02, 1.15)                           | 1.03 (0.97, 1.10)                              |
| Quintile 2                         | 477,625     | 2,075     | 1,096     | 979          | 1.06 (1.01, 1.11)                           | 1.09 (1.02, 1.17)                           | 1.03 (0.96, 1.10)                              |
| Quintile 3                         | 482,536     | 2,024     | 1,017     | 1,007        | 1.06 (1.00, 1.11)                           | 1.07 (0.99, 1.15)                           | 1.04 (0.97, 1.12)                              |
| Quintile 4                         | 487,865     | 1,825     | 930       | 895          | 1.01 (0.96, 1.07)                           | 1.03 (0.96, 1.11)                           | 1.00 (0.93, 1.07)                              |
| Quintile 5                         | 491,496     | 1,852     | 933       | 919          | 1.01 (0.97, 1.06)                           | 1.00 (0.94, 1.06)                           | 1.02 (0.96, 1.09)                              |
| <i>p-for-interaction</i>           |             |           |           |              | 0.30                                        | 0.28                                        | 0.75                                           |
| Time-varying nSES score            |             |           |           |              |                                             |                                             |                                                |
| Quintile 1                         | 520,565     | 2,472     | 1,254     | 1,218        | 1.05 (1.01, 1.09)                           | 1.05 (1.00, 1.11)                           | 1.05 (0.99, 1.10)                              |
| Quintile 2                         | 527,630     | 2,203     | 1,118     | 1,085        | 1.02 (0.98, 1.07)                           | 1.01 (0.95, 1.08)                           | 1.03 (0.97, 1.10)                              |
| Quintile 3                         | 572,052     | 2,134     | 1,103     | 1,031        | 1.02 (0.98, 1.07)                           | 1.03 (0.97, 1.10)                           | 1.02 (0.95, 1.08)                              |
| Quintile 4                         | 334,704     | 1,516     | 880       | 636          | 1.05 (0.99, 1.10)                           | 1.07 (0.99, 1.15)                           | 1.02 (0.94, 1.10)                              |
| Quintile 5                         | 589,084     | 2,006     | 966       | 1,040        | 1.06 (1.00, 1.12)                           | 1.14 (1.05, 1.25)                           | 0.99 (0.92, 1.07)                              |
| <i>p-for-interaction</i>           |             |           |           |              | 0.65                                        | 0.21                                        | 0.61                                           |

<sup>a</sup> Hazard ratios are adjusted for age and calendar year, race, smoking status, pack-years smoked, family history of MI, menopausal status, postmenopausal hormone use, diet, alcohol consumption, BMI, night shift work, parental occupation, educational attainment (RN degree), marital status, husband's highest education, neighborhood SES score, region, and air pollution (PM<sub>2.5</sub>). Stratifying variables are not adjusted in respective analyses. Note: IQR for anthropogenic L<sub>50</sub> nighttime sound: 3.67 dBA.

**Table S2. Nurses' Health Study Person-time, CVD, CHD, stroke cases and fully adjusted HR and 95% confidence intervals for daytime anthropogenic L<sub>50</sub> (median) sound (dBA) from 1988-2018 (n = 114,116) by prespecified stratifying variables.**

|                                    | Person-time | CVD cases | CHD cases | Stroke cases | CVD Fully Adjusted <sup>a</sup> HR (95% CI) | CHD Fully Adjusted <sup>a</sup> HR (95% CI) | Stroke Fully Adjusted <sup>a</sup> HR (95% CI) |
|------------------------------------|-------------|-----------|-----------|--------------|---------------------------------------------|---------------------------------------------|------------------------------------------------|
| Total (unstratified)               | 2,544,035   | 10,331    | 5,321     | 5,010        | 1.04 (1.02, 1.07)                           | 1.06 (1.02, 1.09)                           | 1.03 (1.00, 1.06)                              |
| Population density                 |             |           |           |              |                                             |                                             |                                                |
| ≥1000 people per mile <sup>2</sup> | 1,652,688   | 6,828     | 3,548     | 3,280        | 1.05 (1.01, 1.08)                           | 1.07 (1.03, 1.12)                           | 1.02 (0.97, 1.06)                              |
| <1000 people per mile <sup>2</sup> | 891,348     | 3,503     | 1,773     | 1,730        | 1.05 (1.02, 1.09)                           | 1.05 (1.01, 1.10)                           | 1.05 (1.00, 1.10)                              |
| <i>p</i> -for-interaction          |             |           |           |              | 0.35                                        | 0.45                                        | 0.15                                           |
| Region                             |             |           |           |              |                                             |                                             |                                                |
| <i>Northeast</i>                   | 1,157,696   | 4,457     | 2,320     | 2,137        | 1.06 (1.02, 1.09)                           | 1.06 (1.01, 1.11)                           | 1.05 (1.00, 1.10)                              |
| <i>Midwest</i>                     | 405,844     | 1,582     | 815       | 767          | 1.06 (1.00, 1.12)                           | 1.09 (1.01, 1.18)                           | 1.03 (0.95, 1.11)                              |
| <i>South</i>                       | 421,149     | 1,692     | 831       | 861          | 1.02 (0.97, 1.08)                           | 0.99 (0.93, 1.07)                           | 1.05 (0.98, 1.13)                              |
| <i>West</i>                        | 319,628     | 1,345     | 607       | 738          | 1.04 (0.98, 1.10)                           | 1.09 (1.00, 1.18)                           | 1.00 (0.93, 1.08)                              |
| <i>p</i> -for-interaction          |             |           |           |              | 0.39                                        | 0.22                                        | 0.27                                           |
| Air pollution PM <sub>2.5</sub>    |             |           |           |              |                                             |                                             |                                                |
| <i>Quintile 1</i>                  | 508,998     | 2,066     | 1,082     | 984          | 1.00 (0.96, 1.03)                           | 1.02 (0.97, 1.07)                           | 0.97 (0.92, 1.03)                              |
| <i>Quintile 2</i>                  | 510,635     | 2,027     | 1,009     | 1,018        | 1.05 (1.00, 1.10)                           | 1.06 (0.99, 1.13)                           | 1.04 (0.97, 1.11)                              |
| <i>Quintile 3</i>                  | 510,407     | 2,021     | 1,021     | 1,000        | 1.05 (0.99, 1.10)                           | 1.09 (1.01, 1.17)                           | 1.01 (0.94, 1.08)                              |
| <i>Quintile 4</i>                  | 509,846     | 2,063     | 1,079     | 984          | 1.03 (0.97, 1.08)                           | 1.02 (0.94, 1.09)                           | 1.04 (0.96, 1.12)                              |
| <i>Quintile 5</i>                  | 504,151     | 2,154     | 1,130     | 1,024        | 1.06 (1.00, 1.13)                           | 1.06 (0.98, 1.15)                           | 1.06 (0.97, 1.16)                              |
| <i>p</i> -for-interaction          |             |           |           |              | 0.19                                        | 0.56                                        | 0.24                                           |
| Greenness NDVI                     |             |           |           |              |                                             |                                             |                                                |
| <i>Quintile 1</i>                  | 470,012     | 2,069     | 1,112     | 957          | 1.08 (1.03, 1.13)                           | 1.11 (1.04, 1.18)                           | 1.04 (0.97, 1.11)                              |
| <i>Quintile 2</i>                  | 477,625     | 2,075     | 1,096     | 979          | 1.05 (1.00, 1.10)                           | 1.07 (1.00, 1.15)                           | 1.03 (0.96, 1.10)                              |
| <i>Quintile 3</i>                  | 482,536     | 2,024     | 1,017     | 1,007        | 1.05 (0.99, 1.10)                           | 1.05 (0.98, 1.13)                           | 1.04 (0.97, 1.12)                              |
| <i>Quintile 4</i>                  | 487,865     | 1,825     | 930       | 895          | 1.01 (0.96, 1.07)                           | 1.03 (0.96, 1.11)                           | 0.99 (0.92, 1.07)                              |
| <i>Quintile 5</i>                  | 491,496     | 1,852     | 933       | 919          | 1.03 (0.98, 1.08)                           | 1.00 (0.94, 1.06)                           | 1.06 (0.99, 1.13)                              |
| <i>p</i> -for-interaction          |             |           |           |              | 0.30                                        | 0.15                                        | 0.55                                           |
| Time-varying nSES score            |             |           |           |              |                                             |                                             |                                                |
| <i>Quintile 1</i>                  | 520,565     | 2,472     | 1,254     | 1,218        | 1.06 (1.02, 1.10)                           | 1.07 (1.02, 1.13)                           | 1.05 (1.00, 1.11)                              |
| <i>Quintile 2</i>                  | 527,630     | 2,203     | 1,118     | 1,085        | 1.00 (0.95, 1.04)                           | 0.99 (0.93, 1.06)                           | 1.00 (0.94, 1.07)                              |
| <i>Quintile 3</i>                  | 572,052     | 2,134     | 1,103     | 1,031        | 1.06 (1.01, 1.11)                           | 1.06 (0.99, 1.13)                           | 1.05 (0.98, 1.12)                              |
| <i>Quintile 4</i>                  | 334,704     | 1,516     | 880       | 636          | 1.04 (0.98, 1.09)                           | 1.08 (1.00, 1.16)                           | 0.99 (0.91, 1.07)                              |
| <i>Quintile 5</i>                  | 589,084     | 2,006     | 966       | 1,040        | 1.06 (1.00, 1.12)                           | 1.09 (1.01, 1.19)                           | 1.03 (0.95, 1.11)                              |
| <i>p</i> -for-interaction          |             |           |           |              | 0.22                                        | 0.30                                        | 0.47                                           |

\*486 CVD cases (233 CHD cases, 253 stroke cases) were missing NDVI; 1,255 CVD cases (748 CHD cases, 507 stroke cases) were missing region.

<sup>a</sup> Hazard ratios are adjusted for age and calendar year, race, smoking status, pack-years smoked, family history of MI, menopausal status, postmenopausal hormone use, diet, alcohol consumption, BMI, night shift work, parental occupation, educational attainment (RN degree), marital status, husband's highest education, neighborhood SES score, region, and air pollution (PM<sub>2.5</sub>). Stratifying variables are not adjusted in respective analyses. Note: IQR for anthropogenic L<sub>50</sub> daytime sound: 4.35 dBA.

**Table S3. Age-Adjusted Nurses' Health Study Participant Characteristics by Quintiles of Nighttime Anthropogenic L<sub>50</sub> dBA from 2000-2018 (n = 95,225).**

| Characteristic                              | Total          | Nighttime L <sub>50</sub> dBA Quintile 1 | Nighttime L <sub>50</sub> dBA Quintile 2 | Nighttime L <sub>50</sub> dBA Quintile 3 | Nighttime L <sub>50</sub> dBA Quintile 4 | Nighttime L <sub>50</sub> dBA Quintile 5 |
|---------------------------------------------|----------------|------------------------------------------|------------------------------------------|------------------------------------------|------------------------------------------|------------------------------------------|
|                                             | Mean (SD) or % | Mean (SD) or %                           | Mean (SD) or %                           | Mean (SD) or %                           | Mean (SD) or %                           | Mean (SD) or %                           |
| L <sub>50</sub> dBA anthropogenic nighttime | 43.1 (3.43)    | 37.2 (3.65)                              | 41.7 (0.54)                              | 43.2 (0.39)                              | 44.6 (0.46)                              | 47.0 (1.28)                              |
| L <sub>50</sub> dBA anthropogenic daytime   | 46.2 (4.08)    | 40.2 (4.86)                              | 44.8 (2.46)                              | 46.8 (2.17)                              | 48.0 (2.09)                              | 49.1 (2.52)                              |
| Age (years) <sup>a</sup>                    | 73.4 (8.12)    | 72.2 (7.96)                              | 72.6 (8.1)                               | 72.8 (8.09)                              | 73.2 (8.18)                              | 73.4 (8.21)                              |
| White (%)                                   | 94             | 96                                       | 96                                       | 95                                       | 92                                       | 90                                       |
| Alternative Healthy Eating Index            | 53.6 (10.4)    | 53.4 (10.3)                              | 53.0 (10.1)                              | 53.3 (10.4)                              | 53.6 (10.3)                              | 53.4 (10.1)                              |
| Alcohol categories (%)                      |                |                                          |                                          |                                          |                                          |                                          |
| 0 grams/day                                 | 29             | 29                                       | 29                                       | 28                                       | 27                                       | 28                                       |
| 0.1-4.9 grams/day                           | 17             | 16                                       | 17                                       | 16                                       | 16                                       | 15                                       |
| 5.0-14.9 grams/day                          | 12             | 12                                       | 12                                       | 12                                       | 12                                       | 10                                       |
| ≥ 15 grams/day                              | 9              | 10                                       | 9                                        | 9                                        | 8                                        | 8                                        |
| Missing                                     | 33             | 33                                       | 35                                       | 35                                       | 37                                       | 39                                       |
| Body Mass Index categories (%)              |                |                                          |                                          |                                          |                                          |                                          |
| Normal/Underweight                          | 40             | 40                                       | 39                                       | 40                                       | 40                                       | 37                                       |
| Overweight                                  | 29             | 30                                       | 30                                       | 29                                       | 28                                       | 28                                       |
| Obese                                       | 19             | 20                                       | 20                                       | 19                                       | 18                                       | 19                                       |
| Missing                                     | 11             | 11                                       | 12                                       | 12                                       | 14                                       | 16                                       |
| Smoking Status (%)                          |                |                                          |                                          |                                          |                                          |                                          |
| Never smoker                                | 46             | 46                                       | 45                                       | 44                                       | 45                                       | 47                                       |
| Past smoker                                 | 46             | 45                                       | 45                                       | 46                                       | 45                                       | 43                                       |
| Current smoker                              | 6              | 6                                        | 6                                        | 7                                        | 6                                        | 6                                        |
| Missing                                     | 3              | 3                                        | 3                                        | 3                                        | 4                                        | 4                                        |
| Pack years of smoking                       | 11.4 (18.7)    | 11.2 (18.5)                              | 11.4 (18.4)                              | 11.8 (19.0)                              | 11.2 (18.8)                              | 10.9 (18.6)                              |
| Have RN degree (%)                          | 74             | 75                                       | 73                                       | 73                                       | 71                                       | 69                                       |
| Married (%)                                 | 56             | 61                                       | 57                                       | 56                                       | 53                                       | 49                                       |
| Husband's Highest Education (%)             |                |                                          |                                          |                                          |                                          |                                          |
| < high school                               | 3              | 4                                        | 4                                        | 3                                        | 3                                        | 3                                        |
| high school grad                            | 26             | 28                                       | 27                                       | 25                                       | 22                                       | 23                                       |
| > high school education                     | 38             | 36                                       | 36                                       | 38                                       | 38                                       | 35                                       |
| Missing or not married                      | 33             | 32                                       | 34                                       | 34                                       | 37                                       | 39                                       |
| Housewife mother (%)                        | 64             | 63                                       | 64                                       | 63                                       | 64                                       | 64                                       |
| Professional or manager father, %           | 26             | 26                                       | 25                                       | 27                                       | 27                                       | 26                                       |
| Family History of MI (%)                    | 25             | 24                                       | 25                                       | 25                                       | 25                                       | 24                                       |
| Menopausal status (%)                       |                |                                          |                                          |                                          |                                          |                                          |
| Premenopausal or missing                    | 64             | 62                                       | 61                                       | 61                                       | 61                                       | 60                                       |
| Postmenopausal                              | 36             | 38                                       | 39                                       | 39                                       | 39                                       | 40                                       |
| Postmenopausal hormone use (%)              |                |                                          |                                          |                                          |                                          |                                          |
| Premenopausal                               | 1              | 1                                        | 1                                        | 1                                        | 1                                        | 1                                        |
| Never                                       | 18             | 19                                       | 18                                       | 18                                       | 17                                       | 16                                       |
| Current                                     | 15             | 16                                       | 15                                       | 16                                       | 16                                       | 16                                       |
| Former                                      | 47             | 46                                       | 46                                       | 45                                       | 44                                       | 43                                       |
| Missing                                     | 20             | 18                                       | 20                                       | 20                                       | 22                                       | 24                                       |
| Night Shift Work                            |                |                                          |                                          |                                          |                                          |                                          |
| Never (%)                                   | 31             | 32                                       | 30                                       | 31                                       | 29                                       | 29                                       |

|                                                                 |             |             |             |             |             |             |
|-----------------------------------------------------------------|-------------|-------------|-------------|-------------|-------------|-------------|
| 1-14 years shift work (%)                                       | 39          | 39          | 39          | 38          | 38          | 36          |
| 15-29 years shift work (%)                                      | 4           | 4           | 4           | 4           | 3           | 4           |
| 30+ years shift work (%)                                        | 1           | 1           | 1           | 1           | 1           | 1           |
| Missing shift work (%)                                          | 25          | 25          | 26          | 27          | 28          | 30          |
| Sleep <5 hours per night (%)                                    | 7           | 7           | 7           | 7           | 7           | 7           |
| Cancer during follow-up (%)                                     | 9           | 9           | 9           | 9           | 9           | 9           |
| Population density $\geq 1000$ per mile <sup>2</sup> (%)        | 64          | 29          | 55          | 74          | 81          | 85          |
| 12-month average PM <sub>2.5</sub> ( $\mu\text{g}/\text{m}^3$ ) | 11.32 (3.8) | 9.26 (3.19) | 11.0 (3.49) | 11.7 (3.66) | 12.1 (3.77) | 12.7 (3.96) |
| 12-month average PM <sub>2.5</sub> Quintile (%)                 |             |             |             |             |             |             |
| Quintile 1                                                      | 20          | 33          | 19          | 14          | 17          | 18          |
| Quintile 2                                                      | 20          | 27          | 23          | 18          | 16          | 16          |
| Quintile 3                                                      | 20          | 19          | 24          | 22          | 18          | 18          |
| Quintile 4                                                      | 20          | 13          | 20          | 24          | 22          | 21          |
| Quintile 5                                                      | 20          | 7           | 15          | 23          | 28          | 27          |
| Region (%)                                                      |             |             |             |             |             |             |
| Northeast                                                       | 43          | 55          | 53          | 44          | 36          | 30          |
| Midwest                                                         | 15          | 10          | 17          | 17          | 13          | 19          |
| South                                                           | 18          | 14          | 15          | 20          | 22          | 17          |
| West                                                            | 12          | 11          | 5           | 8           | 16          | 20          |
| NDVI (in 270m distance buffer)                                  | 0.38 (0.17) | 0.41 (0.19) | 0.39 (0.17) | 0.38 (0.16) | 0.37 (0.15) | 0.33 (0.15) |
| NDVI Quintile (%)                                               |             |             |             |             |             |             |
| Quintile 1                                                      | 18          | 17          | 15          | 15          | 18          | 29          |
| Quintile 2                                                      | 19          | 15          | 17          | 20          | 22          | 22          |
| Quintile 3                                                      | 19          | 15          | 19          | 22          | 22          | 20          |
| Quintile 4                                                      | 19          | 18          | 22          | 22          | 21          | 16          |
| Quintile 5                                                      | 20          | 32          | 23          | 19          | 16          | 11          |
| Neighborhood SES (time-varying) Quintile (%)                    |             |             |             |             |             |             |
| Quintile 1                                                      | 20          | 33          | 21          | 15          | 15          | 15          |
| Quintile 2                                                      | 20          | 20          | 20          | 20          | 20          | 20          |
| Quintile 3                                                      | 24          | 23          | 24          | 25          | 24          | 23          |
| Quintile 4                                                      | 12          | 10          | 11          | 12          | 13          | 15          |
| Quintile 5                                                      | 24          | 14          | 24          | 28          | 29          | 27          |

<sup>a</sup> Value is not age-adjusted

**Table S4. Hazard ratios (HR) and 95% confidence intervals (CIs) for anthropogenic L<sub>50</sub> nighttime and anthropogenic L<sub>50</sub> daytime sound pressure (dBA) and cardiovascular disease incidence in the Nurses' Health Study from 2000 to 2018 (n = 95,225; person-years =1,349,888). Total CVD (CHD or stroke), CHD, and stroke are shown.**

|                           | L <sub>50</sub> nighttime noise            |                             | L <sub>50</sub> daytime noise              |                             |
|---------------------------|--------------------------------------------|-----------------------------|--------------------------------------------|-----------------------------|
|                           | Age and Calendar Year Adjusted HR (95% CI) | Fully Adjusted* HR (95% CI) | Age and Calendar Year Adjusted HR (95% CI) | Fully Adjusted* HR (95% CI) |
| <b>CVD (n = 6,448)</b>    | 1.00 (0.97, 1.03)                          | 1.03 (1.00, 1.05)           | 0.99 (0.97, 1.02)                          | 1.02 (0.99, 1.05)           |
| <b>CHD (n = 3,108)</b>    | 1.02 (0.98, 1.06)                          | 1.05 (1.01, 1.09)           | 1.02 (0.98, 1.06)                          | 1.05 (1.00, 1.09)           |
| <b>Stroke (n = 3,380)</b> | 0.98 (0.94, 1.01)                          | 1.01 (0.97, 1.04)           | 0.97 (0.93, 1.01)                          | 1.00 (0.96, 1.04)           |

\* Hazard ratios are adjusted for age and calendar year, race, smoking status, pack-years smoked, family history of MI, menopausal status, postmenopausal hormone use, diet, alcohol consumption, BMI, night shift work, parental occupation, educational attainment (RN degree), marital status, husband's highest education, nSES score quintile, region, and air pollution (PM<sub>2.5</sub>). Note: IQR for anthropogenic L<sub>50</sub> nighttime sound: 3.67 dBA; IQR for anthropogenic L<sub>50</sub> daytime sound: 4.35 dBA.

**Table S5. Additional (for sensitivity analysis) Age-Adjusted Nurses' Health Study Participant Characteristics by Quintiles of Nighttime Anthropogenic L<sub>50</sub> dBA from 1988-2018 (n = 114,116).**

| Characteristic                                                                             | Total | Nighttime L <sub>50</sub> dBA Quintile 1 | Nighttime L <sub>50</sub> dBA Quintile 2 | Nighttime L <sub>50</sub> dBA Quintile 3 | Nighttime L <sub>50</sub> dBA Quintile 4 | Nighttime L <sub>50</sub> dBA Quintile 5 |
|--------------------------------------------------------------------------------------------|-------|------------------------------------------|------------------------------------------|------------------------------------------|------------------------------------------|------------------------------------------|
| Comorbidities at baseline (diabetes, elevated cholesterol, and/or high blood pressure) (%) | 47    | 47                                       | 48                                       | 48                                       | 47                                       | 47                                       |
| Statin use (%)                                                                             | 20    | 20                                       | 20                                       | 20                                       | 19                                       | 19                                       |
| Aspirin use, doses (%)                                                                     |       |                                          |                                          |                                          |                                          |                                          |
| Non-user                                                                                   | 9     | 8                                        | 8                                        | 9                                        | 9                                        | 9                                        |
| Former user                                                                                | 31    | 32                                       | 32                                       | 31                                       | 31                                       | 31                                       |
| Current user, 1-5 doses/week                                                               | 33    | 34                                       | 33                                       | 33                                       | 32                                       | 32                                       |
| Current user, 6+ doses/week                                                                | 10    | 10                                       | 10                                       | 10                                       | 10                                       | 10                                       |
| Missing                                                                                    | 17    | 15                                       | 16                                       | 17                                       | 18                                       | 20                                       |
| Physical activity categories (MET hours/week)                                              |       |                                          |                                          |                                          |                                          |                                          |
| < 3                                                                                        | 16    | 16                                       | 16                                       | 16                                       | 16                                       | 17                                       |
| 3 to <9                                                                                    | 17    | 17                                       | 18                                       | 17                                       | 18                                       | 17                                       |
| 9 to <18                                                                                   | 16    | 16                                       | 16                                       | 16                                       | 16                                       | 15                                       |
| ≥ 18                                                                                       | 19    | 20                                       | 19                                       | 19                                       | 18                                       | 17                                       |
| Missing                                                                                    | 32    | 31                                       | 31                                       | 31                                       | 32                                       | 34                                       |

**Table S6. Hazard ratios (HR) and 95% confidence intervals (CI) for anthropogenic L<sub>50</sub> nighttime and anthropogenic L<sub>50</sub> daytime sound pressure (dBA) and cardiovascular disease incidence in the**

**Nurses' Health Study (n = 114,116; person-years = 2,544,035; 1988-2018) with: additional adjustment for statin; additional adjustment for aspirin use; additional adjustment for physical activity; and additional adjustment for urbanicity.**

| Model                         | L <sub>50</sub> nighttime noise |                    |                       | L <sub>50</sub> daytime noise |                    |                       |
|-------------------------------|---------------------------------|--------------------|-----------------------|-------------------------------|--------------------|-----------------------|
|                               | CVD<br>(n = 10,331)             | CHD<br>(n = 5,321) | Stroke<br>(n = 5,010) | CVD<br>(n = 10,331)           | CHD<br>(n = 5,321) | Stroke<br>(n = 5,010) |
| <b>Fully Adjusted*</b>        | 1.04 (1.02, 1.06)               | 1.05 (1.02, 1.09)  | 1.02 (0.99, 1.06)     | 1.04 (1.02, 1.07)             | 1.06 (1.02, 1.09)  | 1.03 (1.00, 1.06)     |
| <b>* + comorbidities</b>      | 1.04 (1.02, 1.06)               | 1.05 (1.02, 1.08)  | 1.02 (0.99, 1.06)     | 1.04 (1.02, 1.07)             | 1.06 (1.02, 1.09)  | 1.03 (1.00, 1.06)     |
| <b>* + statin use</b>         | 1.04 (1.02, 1.06)               | 1.05 (1.02, 1.08)  | 1.02 (0.99, 1.06)     | 1.04 (1.02, 1.07)             | 1.06 (1.02, 1.09)  | 1.03 (1.00, 1.06)     |
| <b>* + aspirin use</b>        | 1.04 (1.02, 1.06)               | 1.05 (1.02, 1.09)  | 1.02 (0.99, 1.06)     | 1.04 (1.02, 1.07)             | 1.06 (1.03, 1.09)  | 1.03 (1.00, 1.06)     |
| <b>* + physical activity</b>  | 1.04 (1.02, 1.06)               | 1.05 (1.02, 1.08)  | 1.02 (0.99, 1.05)     | 1.04 (1.02, 1.06)             | 1.06 (1.02, 1.09)  | 1.03 (1.00, 1.06)     |
| <b>* + population density</b> | 1.04 (1.02, 1.06)               | 1.06 (1.03, 1.09)  | 1.02 (0.99, 1.06)     | 1.05 (1.03, 1.07)             | 1.07 (1.03, 1.10)  | 1.03 (1.00, 1.07)     |

\* Hazard ratios are adjusted for age and calendar year, race, smoking status, pack-years smoked, family history of MI, menopausal status, postmenopausal hormone use, diet, alcohol consumption, BMI, night shift work, parental occupation, educational attainment (RN degree), marital status, husband's highest education, nSES score quintile, region, and air pollution (PM<sub>2.5</sub>). Note: IQR for anthropogenic L<sub>50</sub> nighttime sound: 3.67 dBA; IQR for anthropogenic L<sub>50</sub> daytime sound: 4.35 dBA.

**Table S7. Estimated proportion of association of nighttime noise and CVD in the Nurses' Health Study explained by short sleep duration.**

| Mediator                                                      | Proportion of association of L <sub>50</sub> nighttime noise and CVD explained by mediator, with 95% confidence intervals | Proportion of association of L <sub>50</sub> nighttime noise and CHD explained by mediator, with 95% confidence intervals | Proportion of association of L <sub>50</sub> nighttime noise and stroke explained by mediator, with 95% confidence intervals |
|---------------------------------------------------------------|---------------------------------------------------------------------------------------------------------------------------|---------------------------------------------------------------------------------------------------------------------------|------------------------------------------------------------------------------------------------------------------------------|
| <b>Self-reported 5 or less hours sleep duration per night</b> | < 0.01%                                                                                                                   | < 0.01%                                                                                                                   | < 0.01%                                                                                                                      |
